# Supplementary material
Source: publisher site journal article supplement (https://www.spandidos-publications.com/5214/downloadSupplementary)
Supplement: Supplementary file 1 [file downloadSupplementary]

## Sheet: EC9706result-Significant
Table SII. The differentially expressed genes by comparing HPV18-positive ESCC cells EC9706 with HPV-negative cells HKESCC01
Ensembl ID	Symbol	logFC	PValue
ENSG00000135346	CGA	18.0394	7.89e-23
ENSG00000110195	FOLR1	14.3011	9.7e-23
ENSG00000131620	ANO1	-17.3804	1.37e-21
ENSG00000137745	MMP13	-16.4231	8.64e-20
ENSG00000175445	LPL	16.058	4.2e-19
ENSG00000173702	MUC13	15.9281	7.37e-19
ENSG00000129824	RPS4Y1	-15.9075	8.05e-19
ENSG00000011052	NME1-NME2	15.8509	1.03e-18
ENSG00000134757	DSG3	-15.8417	1.07e-18
ENSG00000137975	CLCA2	-15.3851	7.71e-18
ENSG00000169594	BNC1	-15.2078	1.66e-17
ENSG00000083307	GRHL2	-15.1861	1.82e-17
ENSG00000058085	LAMC2	-10.6413	2.23e-17
ENSG00000185477	GPRIN3	11.0232	3.81e-17
ENSG00000129451	KLK10	-14.8872	6.64e-17
ENSG00000162493	PDPN	-14.8302	8.48e-17
ENSG00000069535	MAOB	14.7573	1.16e-16
ENSG00000268388	FENDRR	14.554	2.8e-16
ENSG00000181449	SOX2	-14.4695	4.03e-16
ENSG00000277586	NEFL	-14.4582	4.23e-16
ENSG00000174469	CNTNAP2	-14.4121	5.17e-16
ENSG00000062038	CDH3	-10.4209	6.48e-16
ENSG00000067048	DDX3Y	-14.3523	6.68e-16
ENSG00000064205	CCN5	14.3461	6.88e-16
ENSG00000128340	RAC2	-14.3192	7.71e-16
ENSG00000171246	NPTX1	9.972	7.88e-16
ENSG00000103175	WFDC1	14.2843	9e-16
ENSG00000205420	KRT6A	-9.68793	9.59e-16
ENSG00000146678	IGFBP1	14.252	1.03e-15
ENSG00000154864	PIEZO2	14.1973	1.31e-15
ENSG00000075340	ADD2	-14.1497	1.6e-15
ENSG00000168079	SCARA5	14.1294	1.75e-15
ENSG00000068985	PAGE1	14.1249	1.79e-15
ENSG00000114374	USP9Y	-14.1127	1.88e-15
ENSG00000134709	HOOK1	-14.0948	2.03e-15
ENSG00000181577	C6orf223	14.0903	2.08e-15
ENSG00000275126	H4C13	-14.0824	2.15e-15
ENSG00000115252	PDE1A	14.0681	2.29e-15
ENSG00000065618	COL17A1	-9.50179	2.37e-15
ENSG00000147889	CDKN2A	13.9624	3.6e-15
ENSG00000274618	H4C6	-10.4339	4.22e-15
ENSG00000179399	GPC5	13.9117	4.5e-15
ENSG00000041982	TNC	-9.54474	4.69e-15
ENSG00000172572	PDE3A	9.77705	4.77e-15
ENSG00000198286	CARD11	-13.8785	5.16e-15
ENSG00000091656	ZFHX4	-13.8358	6.2e-15
ENSG00000196557	CACNA1H	13.8202	6.66e-15
ENSG00000163286	ALPG	13.8036	7.14e-15
ENSG00000169213	RAB3B	-13.8005	7.22e-15
ENSG00000161243	FBXO27	-13.7642	8.44e-15
ENSG00000186642	PDE2A	9.71855	8.52e-15
ENSG00000170465	KRT6C	-9.79293	9.76e-15
ENSG00000227619	AL391056.1	13.6847	1.2e-14
ENSG00000060558	GNA15	-13.6819	1.21e-14
ENSG00000142273	CBLC	-13.6749	1.24e-14
ENSG00000086570	FAT2	-9.09076	1.63e-14
ENSG00000143416	SELENBP1	13.6103	1.65e-14
ENSG00000198681	MAGEA1	13.5737	1.92e-14
ENSG00000162892	IL24	-13.5671	1.98e-14
ENSG00000180537	RNF182	9.27419	2.06e-14
ENSG00000175567	UCP2	13.5407	2.23e-14
ENSG00000137948	BRDT	-13.5226	2.39e-14
ENSG00000179869	ABCA13	-9.56386	2.62e-14
ENSG00000248109	MARCOL	13.4453	3.35e-14
ENSG00000167754	KLK5	-9.50702	3.35e-14
ENSG00000159166	LAD1	-9.22381	3.64e-14
ENSG00000136237	RAPGEF5	-13.4173	3.77e-14
ENSG00000072071	ADGRL1	-13.4126	3.84e-14
ENSG00000002587	HS3ST1	-13.3689	4.65e-14
ENSG00000184860	SDR42E1	-13.3602	4.8e-14
ENSG00000174282	ZBTB4	-13.3563	4.9e-14
ENSG00000177494	ZBED2	-13.3524	4.97e-14
ENSG00000067646	ZFY	-13.3118	5.91e-14
ENSG00000186081	KRT5	-8.69212	6.19e-14
ENSG00000103241	FOXF1	13.2976	6.34e-14
ENSG00000183305	MAGEA2B	-13.2956	6.37e-14
ENSG00000123843	C4BPB	9.00146	6.69e-14
ENSG00000166402	TUB	-13.2607	7.37e-14
ENSG00000112541	PDE10A	8.82023	7.95e-14
ENSG00000110427	KIAA1549L	-13.2087	9.22e-14
ENSG00000104413	ESRP1	-8.94771	9.63e-14
ENSG00000111452	ADGRD1	9.20247	9.91e-14
ENSG00000248527	MTATP6P1	10.6305	1.02e-13
ENSG00000169031	COL4A3	13.1825	1.04e-13
ENSG00000163283	ALPP	8.59165	1.06e-13
ENSG00000197641	SERPINB13	-13.1705	1.09e-13
ENSG00000187634	SAMD11	9.48144	1.09e-13
ENSG00000170627	GTSF1	-13.1538	1.17e-13
ENSG00000145506	NKD2	10.5799	1.27e-13
ENSG00000131435	PDLIM4	-13.1289	1.3e-13
ENSG00000139874	SSTR1	13.1108	1.41e-13
ENSG00000185269	NOTUM	13.0973	1.49e-13
ENSG00000197766	CFD	13.0866	1.56e-13
ENSG00000183098	GPC6	-13.0849	1.57e-13
ENSG00000006611	USH1C	9.25105	1.62e-13
ENSG00000101680	LAMA1	8.65656	1.65e-13
ENSG00000140015	KCNH5	13.0682	1.7e-13
ENSG00000138271	GPR87	-13.0528	1.81e-13
ENSG00000130477	UNC13A	8.63309	1.83e-13
ENSG00000088992	TESC	13.0401	1.92e-13
ENSG00000022556	NLRP2	-13.015	2.13e-13
ENSG00000183876	ARSI	-13.0051	2.22e-13
ENSG00000268173	AC007192.1	9.16619	2.34e-13
ENSG00000275379	H3C11	-9.41356	2.41e-13
ENSG00000166670	MMP10	-12.9851	2.42e-13
ENSG00000081277	PKP1	-8.69265	2.44e-13
ENSG00000147027	TMEM47	12.9625	2.67e-13
ENSG00000137880	GCHFR	12.939	2.95e-13
ENSG00000134775	FHOD3	-9.00144	2.96e-13
ENSG00000013016	EHD3	-12.9364	2.97e-13
ENSG00000183878	UTY	-12.9312	3.05e-13
ENSG00000206120	EGFEM1P	12.9203	3.21e-13
ENSG00000260458	KCNJ18	12.9066	3.4e-13
ENSG00000104722	NEFM	-12.8981	3.51e-13
ENSG00000173237	C11orf86	12.8892	3.65e-13
ENSG00000213401	MAGEA12	-12.8588	4.15e-13
ENSG00000196611	MMP1	-9.06318	4.31e-13
ENSG00000131002	TXLNGY	-12.8394	4.5e-13
ENSG00000176406	RIMS2	-12.8366	4.56e-13
ENSG00000163739	CXCL1	-9.04742	4.61e-13
ENSG00000167165	UGT1A6	-12.8169	4.95e-13
ENSG00000133454	MYO18B	-12.8169	4.95e-13
ENSG00000183347	GBP6	-12.8027	5.27e-13
ENSG00000250337	PURPL	9.66018	5.47e-13
ENSG00000180834	MAP6D1	-12.7912	5.54e-13
ENSG00000154764	WNT7A	-12.7709	6.03e-13
ENSG00000198732	SMOC1	8.25065	6.03e-13
ENSG00000101210	EEF1A2	8.23626	6.13e-13
ENSG00000260342	AC138811.2	-12.7488	6.67e-13
ENSG00000012817	KDM5D	-12.7473	6.71e-13
ENSG00000196581	AJAP1	-12.7249	7.38e-13
ENSG00000106018	VIPR2	12.7167	7.66e-13
ENSG00000087128	TMPRSS11E	-12.7097	7.84e-13
ENSG00000148680	HTR7	-12.7082	7.89e-13
ENSG00000117595	IRF6	-8.33798	8.23e-13
ENSG00000060982	BCAT1	-8.27791	8.24e-13
ENSG00000165617	DACT1	-12.6944	8.38e-13
ENSG00000076344	RGS11	12.6767	9.11e-13
ENSG00000172716	SLFN11	-12.6758	9.11e-13
ENSG00000164742	ADCY1	-12.6679	9.39e-13
ENSG00000109819	PPARGC1A	8.83876	9.59e-13
ENSG00000182986	ZNF320	8.97368	9.73e-13
ENSG00000053108	FSTL4	8.14959	9.79e-13
ENSG00000188517	COL25A1	8.97012	9.86e-13
ENSG00000100842	EFS	-12.6537	9.99e-13
ENSG00000270181	BIVM-ERCC5	-12.6458	1.03e-12
ENSG00000160183	TMPRSS3	8.64497	1.09e-12
ENSG00000147100	SLC16A2	-12.6184	1.16e-12
ENSG00000004799	PDK4	12.6146	1.19e-12
ENSG00000275874	PICSAR	12.5825	1.36e-12
ENSG00000133135	RNF128	-12.5806	1.37e-12
ENSG00000129455	KLK8	-12.5772	1.38e-12
ENSG00000171345	KRT19	-8.04531	1.43e-12
ENSG00000178860	MSC	-12.5621	1.48e-12
ENSG00000170153	RNF150	8.14491	1.49e-12
ENSG00000168140	VASN	12.5607	1.5e-12
ENSG00000104267	CA2	-12.5468	1.58e-12
ENSG00000230937	MIR205HG	-8.19311	1.59e-12
ENSG00000268606	MAGEA2	-12.54	1.63e-12
ENSG00000170745	KCNS3	-12.521	1.76e-12
ENSG00000086289	EPDR1	8.83037	1.8e-12
ENSG00000140937	CDH11	-8.30688	1.85e-12
ENSG00000158089	GALNT14	-12.4982	1.95e-12
ENSG00000163624	CDS1	-12.4947	1.97e-12
ENSG00000102390	PBDC1	-12.4947	1.97e-12
ENSG00000104327	CALB1	-8.08415	2.05e-12
ENSG00000186847	KRT14	-7.87876	2.18e-12
ENSG00000269113	TRABD2B	12.4537	2.36e-12
ENSG00000168916	ZNF608	-12.4332	2.56e-12
ENSG00000182107	TMEM30B	-8.49053	2.66e-12
ENSG00000277947	SNORD3D	-12.392	3.07e-12
ENSG00000104998	IL27RA	-12.3882	3.1e-12
ENSG00000107295	SH3GL2	12.3859	3.16e-12
ENSG00000165025	SYK	-12.371	3.34e-12
ENSG00000183117	CSMD1	12.3684	3.41e-12
ENSG00000132334	PTPRE	-12.3437	3.75e-12
ENSG00000286450	AC021573.1	12.3329	3.97e-12
ENSG00000204019	CT83	12.3277	4.05e-12
ENSG00000182866	LCK	-12.3219	4.12e-12
ENSG00000157168	NRG1	-7.85529	4.16e-12
ENSG00000166415	WDR72	-12.3179	4.21e-12
ENSG00000143365	RORC	12.2964	4.64e-12
ENSG00000197632	SERPINB2	-12.2937	4.64e-12
ENSG00000002746	HECW1	8.59924	4.86e-12
ENSG00000100739	BDKRB1	-12.2732	5.07e-12
ENSG00000148671	ADIRF	-12.2732	5.07e-12
ENSG00000185352	HS6ST3	8.58688	5.12e-12
ENSG00000115221	ITGB6	-8.06204	5.39e-12
ENSG00000204381	LAYN	-12.2525	5.56e-12
ENSG00000214049	UCA1	-12.2462	5.73e-12
ENSG00000164647	STEAP1	-12.2462	5.73e-12
ENSG00000167653	PSCA	7.83092	5.75e-12
ENSG00000148468	FAM171A1	-12.2419	5.79e-12
ENSG00000213030	CGB8	-12.2271	6.22e-12
ENSG00000224902	GAGE12H	12.2234	6.35e-12
ENSG00000127129	EDN2	12.2234	6.35e-12
ENSG00000248874	C5orf17	12.2179	6.49e-12
ENSG00000136155	SCEL	-12.2013	6.91e-12
ENSG00000277693	AP003900.1	12.2011	6.98e-12
ENSG00000100473	COCH	-12.1948	7.13e-12
ENSG00000169515	CCDC8	-12.1839	7.44e-12
ENSG00000267121	AC008105.3	8.34247	8.05e-12
ENSG00000183287	CCBE1	-8.23089	8.11e-12
ENSG00000039068	CDH1	-7.7161	8.24e-12
ENSG00000286169	AHRR	7.58493	8.25e-12
ENSG00000169129	AFAP1L2	-7.79183	8.91e-12
ENSG00000087494	PTHLH	-7.66803	8.99e-12
ENSG00000274290	H2BC6	-7.68146	9.95e-12
ENSG00000105889	STEAP1B	-12.1049	1.05e-11
ENSG00000153292	ADGRF1	-12.1049	1.05e-11
ENSG00000229544	NKX1-2	-12.0956	1.08e-11
ENSG00000174502	SLC26A9	12.0898	1.12e-11
ENSG00000273301	AC016717.2	12.0715	1.21e-11
ENSG00000156414	TDRD9	8.07484	1.26e-11
ENSG00000141338	ABCA8	12.0622	1.27e-11
ENSG00000121297	TSHZ3	-12.0481	1.33e-11
ENSG00000057704	TMCC3	-12.0409	1.36e-11
ENSG00000164400	CSF2	-12.036	1.39e-11
ENSG00000055732	MCOLN3	-12.036	1.39e-11
ENSG00000075461	CACNG4	-12.0287	1.44e-11
ENSG00000144460	NYAP2	12.0277	1.46e-11
ENSG00000163295	ALPI	12.0085	1.59e-11
ENSG00000143375	CGN	-12.0016	1.63e-11
ENSG00000196754	S100A2	-7.4078	1.64e-11
ENSG00000130413	STK33	-11.9739	1.82e-11
ENSG00000124253	PCK1	11.9726	1.84e-11
ENSG00000123892	RAB38	-11.9714	1.84e-11
ENSG00000248405	PRR5-ARHGAP8	-11.9586	1.93e-11
ENSG00000171401	KRT13	-11.9431	2.08e-11
ENSG00000257042	AC008011.2	-11.9327	2.16e-11
ENSG00000198093	ZNF649	-11.9222	2.28e-11
ENSG00000078081	LAMP3	-11.9196	2.31e-11
ENSG00000163083	INHBB	7.99799	2.35e-11
ENSG00000146904	EPHA1	-11.9037	2.46e-11
ENSG00000197261	C6orf141	-11.901	2.49e-11
ENSG00000103460	TOX3	11.8981	2.56e-11
ENSG00000115457	IGFBP2	-11.893	2.56e-11
ENSG00000179059	ZFP42	-11.8549	3.03e-11
ENSG00000130558	OLFM1	7.43712	3.03e-11
ENSG00000231419	LINC00689	11.8522	3.08e-11
ENSG00000124249	KCNK15	7.86055	3.15e-11
ENSG00000272068	AL365181.2	11.8414	3.25e-11
ENSG00000198223	CSF2RA	8.69871	3.37e-11
ENSG00000119698	PPP4R4	-11.8298	3.38e-11
ENSG00000165757	JCAD	-11.8185	3.52e-11
ENSG00000137868	STRA6	-11.8157	3.57e-11
ENSG00000172292	CERS6	-7.38192	3.59e-11
ENSG00000144063	MALL	-8.23835	3.72e-11
ENSG00000132321	IQCA1	-11.8072	3.72e-11
ENSG00000114115	RBP1	-11.7986	3.82e-11
ENSG00000139144	PIK3C2G	-11.7957	3.88e-11
ENSG00000227467	LINC01537	11.7936	3.99e-11
ENSG00000166396	SERPINB7	-11.7813	4.1e-11
ENSG00000235123	DSCAM-AS1	8.09655	4.15e-11
ENSG00000106278	PTPRZ1	-7.84763	4.18e-11
ENSG00000185201	IFITM2	7.63481	4.25e-11
ENSG00000101194	SLC17A9	11.7748	4.28e-11
ENSG00000167972	ABCA3	7.4485	4.34e-11
ENSG00000198930	CSAG1	-11.7697	4.34e-11
ENSG00000286042	LCAL1	-11.7697	4.34e-11
ENSG00000118402	ELOVL4	-11.7667	4.4e-11
ENSG00000258643	BCL2L2-PABPN1	-11.7667	4.4e-11
ENSG00000187908	DMBT1	11.7672	4.46e-11
ENSG00000107159	CA9	7.67602	4.65e-11
ENSG00000267041	ZNF850	-11.752	4.66e-11
ENSG00000204179	PTPN20	-11.749	4.73e-11
ENSG00000158457	TSPAN33	-11.7341	5.08e-11
ENSG00000034053	APBA2	-11.7311	5.08e-11
ENSG00000183397	C19orf71	11.7287	5.23e-11
ENSG00000100077	GRK3	-7.2445	5.33e-11
ENSG00000146555	SDK1	-11.719	5.38e-11
ENSG00000135454	B4GALNT1	-11.719	5.38e-11
ENSG00000143469	SYT14	-11.713	5.54e-11
ENSG00000276547	PCDHGB5	-7.51505	5.6e-11
ENSG00000159184	HOXB13	11.709	5.71e-11
ENSG00000269586	CT45A10	11.701	5.88e-11
ENSG00000144369	FAM171B	-11.6977	5.88e-11
ENSG00000153162	BMP6	7.2829	5.91e-11
ENSG00000176845	METRNL	7.35696	6.11e-11
ENSG00000114923	SLC4A3	-11.6884	6.15e-11
ENSG00000151702	FLI1	-11.6884	6.15e-11
ENSG00000258548	LINC00645	-11.6884	6.15e-11
ENSG00000153294	ADGRF4	-11.6853	6.24e-11
ENSG00000122861	PLAU	-7.08656	6.76e-11
ENSG00000168785	TSPAN5	-7.72862	6.94e-11
ENSG00000141527	CARD14	7.1816	7.16e-11
ENSG00000110002	VWA5A	7.13615	7.16e-11
ENSG00000113657	DPYSL3	-7.17349	7.17e-11
ENSG00000198829	SUCNR1	-11.6476	7.27e-11
ENSG00000257921	AC025165.3	-11.6476	7.27e-11
ENSG00000026559	KCNG1	-11.6476	7.27e-11
ENSG00000179403	VWA1	-7.52063	7.31e-11
ENSG00000141540	TTYH2	-11.638	7.61e-11
ENSG00000069188	SDK2	-11.638	7.61e-11
ENSG00000259976	AC093010.3	7.95471	7.63e-11
ENSG00000276023	DUSP14	-11.6316	7.73e-11
ENSG00000287426	AP003327.2	-11.6284	7.85e-11
ENSG00000107242	PIP5K1B	7.93535	8.28e-11
ENSG00000095303	PTGS1	7.19917	8.38e-11
ENSG00000119946	CNNM1	-11.6122	8.49e-11
ENSG00000218336	TENM3	-7.29382	8.53e-11
ENSG00000070190	DAPP1	-8.38134	8.65e-11
ENSG00000171488	LRRC8C	-7.3232	8.69e-11
ENSG00000102854	MSLN	7.02966	9e-11
ENSG00000167191	GPRC5B	-11.5958	9.04e-11
ENSG00000146477	SLC22A3	7.60409	9.41e-11
ENSG00000128573	FOXP2	11.5849	9.64e-11
ENSG00000116183	PAPPA2	7.16642	9.65e-11
ENSG00000107105	ELAVL2	-11.5792	9.8e-11
ENSG00000081052	COL4A4	7.16177	1e-10
ENSG00000259803	SLC22A31	11.5632	1.06e-10
ENSG00000091129	NRCAM	-11.559	1.06e-10
ENSG00000003436	TFPI	7.02135	1.07e-10
ENSG00000261706	LINC00165	11.5588	1.08e-10
ENSG00000171631	P2RY6	7.43618	1.12e-10
ENSG00000006555	TTC22	-11.542	1.13e-10
ENSG00000269693	AC010422.6	-11.5351	1.17e-10
ENSG00000101076	HNF4A	8.97788	1.21e-10
ENSG00000160224	AIRE	11.5277	1.23e-10
ENSG00000198692	EIF1AY	-11.5247	1.23e-10
ENSG00000275004	ZNF280B	-11.5038	1.34e-10
ENSG00000278456	AC015712.7	-11.5038	1.34e-10
ENSG00000104177	MYEF2	-11.5003	1.36e-10
ENSG00000142619	PADI3	-11.4967	1.39e-10
ENSG00000169403	PTAFR	-11.4896	1.41e-10
ENSG00000178163	ZNF518B	-7.2094	1.41e-10
ENSG00000119138	KLF9	7.0803	1.42e-10
ENSG00000131018	SYNE1	7.15149	1.47e-10
ENSG00000146267	FAXC	-11.4789	1.49e-10
ENSG00000165685	TMEM52B	-7.22543	1.52e-10
ENSG00000169469	SPRR1B	-11.4682	1.56e-10
ENSG00000253706	AC011632.1	-11.4682	1.56e-10
ENSG00000111224	PARP11	-11.4646	1.56e-10
ENSG00000165521	EML5	-11.4646	1.56e-10
ENSG00000180543	TSPYL5	-7.52644	1.64e-10
ENSG00000164114	MAP9	-7.4057	1.71e-10
ENSG00000122862	SRGN	6.86813	1.94e-10
ENSG00000182013	PNMA8A	-7.48213	1.98e-10
ENSG00000173641	HSPB7	11.4107	2.01e-10
ENSG00000151136	BTBD11	-11.398	2.08e-10
ENSG00000170542	SERPINB9	-11.3942	2.12e-10
ENSG00000183072	NKX2-5	-11.3789	2.28e-10
ENSG00000165246	NLGN4Y	-11.3789	2.28e-10
ENSG00000164509	IL31RA	-11.3751	2.32e-10
ENSG00000128011	LRFN1	-11.3751	2.32e-10
ENSG00000130600	H19	6.96163	2.33e-10
ENSG00000172260	NEGR1	7.26287	2.34e-10
ENSG00000168243	GNG4	-11.3674	2.36e-10
ENSG00000180938	ZNF572	-11.3635	2.41e-10
ENSG00000007372	PAX6	7.68305	2.41e-10
ENSG00000109255	NMU	-11.3596	2.45e-10
ENSG00000186448	ZNF197	11.3612	2.5e-10
ENSG00000127152	BCL11B	-7.0968	2.63e-10
ENSG00000249478	AC010307.3	11.346	2.65e-10
ENSG00000118946	PCDH17	11.3357	2.75e-10
ENSG00000159307	SCUBE1	11.3306	2.8e-10
ENSG00000149564	ESAM	7.64779	2.81e-10
ENSG00000287238	AP002954.2	11.3203	2.97e-10
ENSG00000060140	STYK1	-11.3162	2.97e-10
ENSG00000266714	MYO15B	6.81637	3.1e-10
ENSG00000140297	GCNT3	11.3046	3.14e-10
ENSG00000272405	AL365181.3	7.18894	3.2e-10
ENSG00000169418	NPR1	7.31323	3.26e-10
ENSG00000163825	RTP3	-11.292	3.27e-10
ENSG00000257529	RPL36A-HNRNPH2	-11.2838	3.4e-10
ENSG00000108176	DNAJC12	11.2835	3.47e-10
ENSG00000196917	HCAR1	-11.2756	3.47e-10
ENSG00000253305	PCDHGB6	-11.2756	3.47e-10
ENSG00000064655	EYA2	-11.2756	3.47e-10
ENSG00000149557	FEZ1	-7.49594	3.53e-10
ENSG00000286934	AC027251.1	11.2674	3.68e-10
ENSG00000112559	MDFI	-6.9728	3.86e-10
ENSG00000240893	LINC02042	-11.2465	3.99e-10
ENSG00000078018	MAP2	-11.238	4.07e-10
ENSG00000249816	LINC00964	-11.238	4.07e-10
ENSG00000018236	CNTN1	-7.04561	4.14e-10
ENSG00000065325	GLP2R	6.82374	4.16e-10
ENSG00000260927	AC009107.2	6.91128	4.3e-10
ENSG00000198910	L1CAM	6.6265	4.31e-10
ENSG00000213931	HBE1	11.2293	4.32e-10
ENSG00000279993	AC078925.3	11.2293	4.32e-10
ENSG00000253161	LINC01605	-11.2167	4.5e-10
ENSG00000165078	CPA6	-11.2124	4.6e-10
ENSG00000180190	TDRP	-11.2124	4.6e-10
ENSG00000108932	SLC16A6	6.64016	4.78e-10
ENSG00000267757	EML2-AS1	11.2014	4.89e-10
ENSG00000226210	WASH8P	11.1957	5e-10
ENSG00000229989	MIR181A1HG	-11.1864	5.1e-10
ENSG00000099725	PRKY	-7.40314	5.2e-10
ENSG00000006606	CCL26	-11.182	5.21e-10
ENSG00000150627	WDR17	-11.1776	5.32e-10
ENSG00000171033	PKIA	-11.1776	5.32e-10
ENSG00000130707	ASS1	6.558	5.39e-10
ENSG00000073282	TP63	-6.69967	5.4e-10
ENSG00000187172	BAGE2	11.1729	5.44e-10
ENSG00000257093	DENND11	-7.23605	5.63e-10
ENSG00000166145	SPINT1	-6.73311	5.71e-10
ENSG00000235098	ANKRD65	-11.1553	5.79e-10
ENSG00000285043	AC093512.2	6.61141	5.88e-10
ENSG00000167723	TRPV3	-11.1509	5.92e-10
ENSG00000222047	C10orf55	-11.1509	5.92e-10
ENSG00000280693	SH3PXD2A-AS1	-11.1509	5.92e-10
ENSG00000204529	GUCY2EP	11.1498	6.05e-10
ENSG00000114854	TNNC1	11.1439	6.18e-10
ENSG00000204219	TCEA3	11.138	6.32e-10
ENSG00000154451	GBP5	-11.1373	6.32e-10
ENSG00000116745	RPE65	-11.1328	6.32e-10
ENSG00000076716	GPC4	-11.1328	6.32e-10
ENSG00000143028	SYPL2	11.1321	6.45e-10
ENSG00000261934	PCDHGA9	-11.1237	6.6e-10
ENSG00000163993	S100P	6.79484	6.69e-10
ENSG00000106034	CPED1	7.14021	6.75e-10
ENSG00000126217	MCF2L	6.70876	6.78e-10
ENSG00000221944	TIGD1	11.1203	6.89e-10
ENSG00000121552	CSTA	-6.79943	7e-10
ENSG00000226476	LINC01748	-11.1099	7.05e-10
ENSG00000130038	CRACR2A	-11.1099	7.05e-10
ENSG00000101188	NTSR1	11.1083	7.2e-10
ENSG00000256771	ZNF253	11.1083	7.2e-10
ENSG00000235297	FAUP1	-11.0959	7.37e-10
ENSG00000127589	TUBBP1	-6.66421	7.65e-10
ENSG00000196440	ARMCX4	-11.0771	8.06e-10
ENSG00000021826	CPS1	6.46525	8.06e-10
ENSG00000121966	CXCR4	6.56506	8.1e-10
ENSG00000198758	EPS8L3	11.0779	8.24e-10
ENSG00000166535	A2ML1	-11.0724	8.24e-10
ENSG00000172818	OVOL1	-11.0676	8.43e-10
ENSG00000132530	XAF1	-11.0581	8.63e-10
ENSG00000056487	PHF21B	-11.0581	8.63e-10
ENSG00000276075	AC027682.6	11.0594	8.82e-10
ENSG00000121769	FABP3	6.64733	8.9e-10
ENSG00000275945	EIF3FP1	7.07383	9e-10
ENSG00000110328	GALNT18	-6.77337	9.01e-10
ENSG00000259672	AC087612.1	-11.0436	9.24e-10
ENSG00000268902	CSAG2	-11.0436	9.24e-10
ENSG00000155629	PIK3AP1	-11.0388	9.46e-10
ENSG00000231764	DLX6-AS1	-11.0388	9.46e-10
ENSG00000173482	PTPRM	6.49491	9.93e-10
ENSG00000145934	TENM2	-6.51822	1.02e-09
ENSG00000144115	THNSL2	-11.0094	1.06e-09
ENSG00000284378	MIR1244-1	8.45833	1.08e-09
ENSG00000206341	HLA-H	-11.0044	1.09e-09
ENSG00000152454	AC010326.1	-11.0044	1.09e-09
ENSG00000200795	RNU4-1	-7.7758	1.13e-09
ENSG00000242779	ZNF702P	10.9894	1.2e-09
ENSG00000259692	AC104041.1	-10.9844	1.2e-09
ENSG00000079215	SLC1A3	-10.9793	1.23e-09
ENSG00000240771	ARHGEF25	-10.9793	1.23e-09
ENSG00000135299	ANKRD6	-10.9743	1.23e-09
ENSG00000125850	OVOL2	-10.9743	1.23e-09
ENSG00000152766	ANKRD22	-10.9692	1.26e-09
ENSG00000198719	DLL1	-10.9692	1.26e-09
ENSG00000121316	PLBD1	-10.9641	1.29e-09
ENSG00000001561	ENPP4	-10.9589	1.32e-09
ENSG00000159374	M1AP	10.9564	1.35e-09
ENSG00000153707	PTPRD	10.9564	1.35e-09
ENSG00000196352	CD55	6.33682	1.38e-09
ENSG00000197153	H3C12	-6.47593	1.41e-09
ENSG00000255730	AC011462.1	6.64977	1.44e-09
ENSG00000278704	BX004987.1	7.26133	1.44e-09
ENSG00000140057	AK7	10.943	1.46e-09
ENSG00000275410	HNF1B	10.9362	1.49e-09
ENSG00000071051	NCK2	-10.9278	1.49e-09
ENSG00000272046	AL445647.1	10.9294	1.53e-09
ENSG00000133069	TMCC2	-10.9226	1.53e-09
ENSG00000106066	CPVL	-6.99311	1.57e-09
ENSG00000273003	ARL2-SNX15	10.9158	1.61e-09
ENSG00000166920	C15orf48	-10.9067	1.65e-09
ENSG00000165359	INTS6L	-10.9014	1.69e-09
ENSG00000161905	ALOX15	10.895	1.78e-09
ENSG00000185479	KRT6B	-6.44021	1.8e-09
ENSG00000109667	SLC2A9	-7.66075	1.82e-09
ENSG00000233198	RNF224	10.888	1.83e-09
ENSG00000253873	PCDHGA11	-10.8798	1.83e-09
ENSG00000253953	PCDHGB4	-10.8798	1.83e-09
ENSG00000182580	EPHB3	-10.8744	1.88e-09
ENSG00000151067	CACNA1C	10.874	1.92e-09
ENSG00000047617	ANO2	6.54798	1.95e-09
ENSG00000138759	FRAS1	-6.62083	1.98e-09
ENSG00000165949	IFI27	-6.67655	1.98e-09
ENSG00000170500	LONRF2	-10.858	2.03e-09
ENSG00000092096	SLC22A17	-10.858	2.03e-09
ENSG00000237517	DGCR5	-10.8525	2.08e-09
ENSG00000085552	IGSF9	-6.65089	2.16e-09
ENSG00000151025	GPR158	-10.8358	2.19e-09
ENSG00000134917	ADAMTS8	10.8382	2.25e-09
ENSG00000153551	CMTM7	-10.8302	2.25e-09
ENSG00000196337	CGB7	-10.8302	2.25e-09
ENSG00000053918	KCNQ1	6.42438	2.31e-09
ENSG00000159164	SV2A	-10.8246	2.31e-09
ENSG00000187243	MAGED4B	-10.8246	2.31e-09
ENSG00000123838	C4BPA	10.8236	2.38e-09
ENSG00000155849	ELMO1	10.8163	2.44e-09
ENSG00000164197	RNF180	-10.8133	2.44e-09
ENSG00000286523	AL022151.1	7.13548	2.44e-09
ENSG00000184058	TBX1	6.35093	2.52e-09
ENSG00000144821	MYH15	-10.7962	2.58e-09
ENSG00000179855	GIPC3	6.47859	2.61e-09
ENSG00000240184	PCDHGC3	-6.44758	2.64e-09
ENSG00000166349	RAG1	-10.7904	2.65e-09
ENSG00000259863	SH3RF3-AS1	8.24223	2.68e-09
ENSG00000215246	AC116351.1	10.794	2.72e-09
ENSG00000180257	ZNF816	7.1098	2.73e-09
ENSG00000214510	SPINK13	10.779	2.88e-09
ENSG00000185614	INKA1	-10.773	2.88e-09
ENSG00000167355	OR51B5	10.7714	2.96e-09
ENSG00000054983	GALC	-6.84019	3.01e-09
ENSG00000182968	SOX1	-10.7613	3.04e-09
ENSG00000101443	WFDC2	-10.7554	3.04e-09
ENSG00000172349	IL16	-10.7554	3.04e-09
ENSG00000175556	LONRF3	6.48266	3.04e-09
ENSG00000269825	AC022150.4	6.72841	3.09e-09
ENSG00000227764	LINC01693	10.7562	3.13e-09
ENSG00000141639	MAPK4	10.7562	3.13e-09
ENSG00000258881	AC007040.2	-10.7494	3.13e-09
ENSG00000177374	HIC1	7.62773	3.15e-09
ENSG00000287656	AL591069.1	10.7485	3.22e-09
ENSG00000259884	NR4A1AS	10.7485	3.22e-09
ENSG00000213949	ITGA1	6.16146	3.26e-09
ENSG00000125508	SRMS	10.7408	3.31e-09
ENSG00000169436	COL22A1	-10.7375	3.31e-09
ENSG00000166704	ZNF606	-10.7375	3.31e-09
ENSG00000184254	ALDH1A3	-6.13441	3.32e-09
ENSG00000150551	LYPD1	-6.81144	3.39e-09
ENSG00000163590	PPM1L	-10.7255	3.5e-09
ENSG00000151612	ZNF827	-6.4831	3.53e-09
ENSG00000166147	FBN1	6.1273	3.58e-09
ENSG00000264575	LINC00526	7.04353	3.6e-09
ENSG00000132698	RAB25	-6.479	3.6e-09
ENSG00000163568	AIM2	-10.7195	3.6e-09
ENSG00000215845	TSTD1	-10.7195	3.6e-09
ENSG00000254221	PCDHGB1	-6.6866	3.61e-09
ENSG00000087245	MMP2	-6.19444	3.75e-09
ENSG00000146950	SHROOM2	-10.7073	3.82e-09
ENSG00000228697	AL023755.1	-10.7073	3.82e-09
ENSG00000189052	CGB5	-10.695	3.93e-09
ENSG00000144278	GALNT13	-10.6889	4.05e-09
ENSG00000162520	SYNC	6.42486	4.09e-09
ENSG00000207165	SNORA70	-7.45995	4.28e-09
ENSG00000171408	PDE7B	6.60936	4.29e-09
ENSG00000285108	AC103718.1	-10.6764	4.29e-09
ENSG00000116962	NID1	-6.48182	4.49e-09
ENSG00000247134	AC090204.1	-10.6639	4.55e-09
ENSG00000149970	CNKSR2	-10.6639	4.55e-09
ENSG00000183742	MACC1	-6.47427	4.56e-09
ENSG00000136869	TLR4	6.68653	4.57e-09
ENSG00000129993	CBFA2T3	10.6611	4.69e-09
ENSG00000103723	AP3B2	-10.6512	4.69e-09
ENSG00000090776	EFNB1	-6.11728	4.75e-09
ENSG00000154545	MAGED4	-10.6449	4.83e-09
ENSG00000033327	GAB2	6.24381	4.9e-09
ENSG00000229953	AL590666.2	10.6446	4.98e-09
ENSG00000129194	SOX15	-6.22708	5.2e-09
ENSG00000142583	SLC2A5	6.33009	5.33e-09
ENSG00000153132	CLGN	6.94048	5.53e-09
ENSG00000204642	HLA-F	-10.6126	5.63e-09
ENSG00000213145	CRIP1	6.09201	5.69e-09
ENSG00000262943	ALOX12P2	-6.41754	5.78e-09
ENSG00000116106	EPHA4	-10.6061	5.8e-09
ENSG00000242908	AADACL2-AS1	-10.5995	5.8e-09
ENSG00000133106	EPSTI1	-10.5995	5.8e-09
ENSG00000171517	LPAR3	-6.68188	5.83e-09
ENSG00000136630	HLX	6.20152	5.87e-09
ENSG00000170873	MTSS1	-6.0564	6.14e-09
ENSG00000237596	AL138828.1	8.04502	6.15e-09
ENSG00000279940	AC073862.3	10.5854	6.37e-09
ENSG00000153976	HS3ST3A1	-10.5796	6.37e-09
ENSG00000189420	ZFP92	-10.5729	6.58e-09
ENSG00000107331	ABCA2	5.96991	6.92e-09
ENSG00000132970	WASF3	-7.33501	7.21e-09
ENSG00000280081	LINC01667	10.5593	7.24e-09
ENSG00000144681	STAC	-10.5527	7.24e-09
ENSG00000170892	TSEN34	10.5504	7.47e-09
ENSG00000179776	CDH5	10.5504	7.47e-09
ENSG00000184226	PCDH9	-6.36035	7.5e-09
ENSG00000251169	LINC01843	10.5416	7.72e-09
ENSG00000198934	MAGEE1	-10.5321	7.72e-09
ENSG00000147883	CDKN2B	6.46834	7.76e-09
ENSG00000176641	RNF152	-6.19806	7.8e-09
ENSG00000027869	SH2D2A	6.12927	7.84e-09
ENSG00000254101	LINC02055	-10.5252	7.97e-09
ENSG00000277200	AC005696.4	10.5146	8.51e-09
ENSG00000279129	AC046158.3	-10.5113	8.51e-09
ENSG00000178826	TMEM139	6.83472	8.62e-09
ENSG00000118596	SLC16A7	6.01757	8.64e-09
ENSG00000142552	RCN3	5.93692	8.77e-09
ENSG00000256810	AC078925.1	10.5055	8.8e-09
ENSG00000188959	C9orf152	10.5055	8.8e-09
ENSG00000140511	HAPLN3	-10.4972	9.1e-09
ENSG00000169174	PCSK9	5.90743	9.17e-09
ENSG00000102109	PCSK1N	-10.483	9.4e-09
ENSG00000176658	MYO1D	-5.98029	9.48e-09
ENSG00000205562	AL049775.1	-6.56501	9.56e-09
ENSG00000127324	TSPAN8	6.50699	9.7e-09
ENSG00000054179	ENTPD2	10.4872	9.73e-09
ENSG00000009709	PAX7	-10.4759	9.73e-09
ENSG00000184937	WT1	-10.4687	1.01e-08
ENSG00000019186	CYP24A1	-10.4687	1.01e-08
ENSG00000119915	ELOVL3	6.79767	1.01e-08
ENSG00000256977	LIMS3	10.4686	1.04e-08
ENSG00000173040	EVC2	-10.4614	1.04e-08
ENSG00000163909	HEYL	-10.4542	1.08e-08
ENSG00000121236	TRIM6	-6.53484	1.08e-08
ENSG00000155974	GRIP1	-6.53014	1.1e-08
ENSG00000112769	LAMA4	10.4497	1.11e-08
ENSG00000240541	TM4SF1-AS1	10.4497	1.11e-08
ENSG00000152977	ZIC1	-10.4469	1.11e-08
ENSG00000115226	FNDC4	-10.4469	1.11e-08
ENSG00000184471	C1QTNF8	10.4402	1.15e-08
ENSG00000167757	KLK11	-10.4395	1.15e-08
ENSG00000100228	RAB36	-6.16735	1.16e-08
ENSG00000147697	GSDMC	-6.19923	1.16e-08
ENSG00000240280	TCAM1P	6.16121	1.17e-08
ENSG00000181634	TNFSF15	-6.51358	1.18e-08
ENSG00000171124	FUT3	-10.4322	1.19e-08
ENSG00000132563	REEP2	-10.4322	1.19e-08
ENSG00000205978	NYNRIN	-6.18924	1.21e-08
ENSG00000185686	PRAME	10.4306	1.24e-08
ENSG00000226383	LINC01876	-10.4173	1.24e-08
ENSG00000169255	B3GALNT1	-10.4173	1.24e-08
ENSG00000224596	ZMIZ1-AS1	10.421	1.28e-08
ENSG00000259881	AC092384.2	10.421	1.28e-08
ENSG00000204516	MICB	10.421	1.28e-08
ENSG00000171766	GATM	-10.4098	1.28e-08
ENSG00000150556	LYPD6B	-10.4098	1.28e-08
ENSG00000213793	ZNF888	6.73186	1.33e-08
ENSG00000023892	DEF6	-6.17198	1.34e-08
ENSG00000133216	EPHB2	-6.47253	1.4e-08
ENSG00000280002	AC078925.4	10.3917	1.42e-08
ENSG00000146707	POMZP3	10.3917	1.42e-08
ENSG00000144407	PTH2R	-10.3871	1.42e-08
ENSG00000003989	SLC7A2	5.78566	1.43e-08
ENSG00000162591	MEGF6	5.80167	1.46e-08
ENSG00000176165	FOXG1	-10.3795	1.48e-08
ENSG00000163710	PCOLCE2	-10.3795	1.48e-08
ENSG00000114279	FGF12	6.28026	1.48e-08
ENSG00000235374	SSR4P1	6.6978	1.51e-08
ENSG00000005001	PRSS22	-10.3718	1.53e-08
ENSG00000253537	PCDHGA7	-10.3641	1.53e-08
ENSG00000113749	HRH2	-10.3641	1.53e-08
ENSG00000133101	CCNA1	-10.3641	1.53e-08
ENSG00000166979	EVA1C	5.96575	1.56e-08
ENSG00000128602	SMO	-6.02537	1.56e-08
ENSG00000145284	SCD5	-6.18314	1.57e-08
ENSG00000170561	IRX2	-6.0873	1.63e-08
ENSG00000119866	BCL11A	-6.42777	1.7e-08
ENSG00000184709	LRRC26	10.3414	1.77e-08
ENSG00000286656	AC008875.2	10.3414	1.77e-08
ENSG00000273706	LHX1	-10.3327	1.77e-08
ENSG00000008735	MAPK8IP2	-10.3327	1.77e-08
ENSG00000235531	MSC-AS1	-6.22	1.79e-08
ENSG00000223764	LINC02593	6.04918	1.8e-08
ENSG00000249437	NAIP	10.3312	1.84e-08
ENSG00000197953	AADACL2	-10.3248	1.84e-08
ENSG00000236609	ZNF853	-10.3248	1.84e-08
ENSG00000172985	SH3RF3	5.8412	1.88e-08
ENSG00000162399	BSND	10.3208	1.91e-08
ENSG00000172548	NIPAL4	-10.3168	1.91e-08
ENSG00000067798	NAV3	-5.89935	1.92e-08
ENSG00000023171	GRAMD1B	5.75246	1.96e-08
ENSG00000092068	SLC7A8	-5.82084	1.98e-08
ENSG00000155962	CLIC2	6.33627	1.99e-08
ENSG00000280217	AC126564.1	7.18606	2e-08
ENSG00000101144	BMP7	-6.1215	2.02e-08
ENSG00000255553	LINC02733	10.2999	2.06e-08
ENSG00000170703	TTLL6	10.2999	2.06e-08
ENSG00000115232	ITGA4	-5.96457	2.08e-08
ENSG00000099822	HCN2	5.77808	2.08e-08
ENSG00000139304	PTPRQ	6.26908	2.11e-08
ENSG00000203650	LINC01285	10.2894	2.14e-08
ENSG00000275538	RNVU1-19	-10.2844	2.14e-08
ENSG00000224003	YES1P1	-10.2844	2.14e-08
ENSG00000150995	ITPR1	5.6941	2.16e-08
ENSG00000188747	NOXA1	6.3096	2.22e-08
ENSG00000176728	TTTY14	-10.2762	2.22e-08
ENSG00000185760	KCNQ5	-6.35525	2.28e-08
ENSG00000273812	BX640514.2	10.2787	2.31e-08
ENSG00000100055	CYTH4	-10.2679	2.31e-08
ENSG00000226887	ERVMER34-1	-10.2679	2.31e-08
ENSG00000172123	SLFN12	-10.2679	2.31e-08
ENSG00000263426	RN7SL471P	-10.2679	2.31e-08
ENSG00000183484	GPR132	-10.2679	2.31e-08
ENSG00000169554	ZEB2	5.98536	2.35e-08
ENSG00000131711	MAP1B	-5.69208	2.39e-08
ENSG00000236393	AC091806.1	10.268	2.4e-08
ENSG00000225950	NTF4	-10.2596	2.4e-08
ENSG00000006468	ETV1	6.29024	2.42e-08
ENSG00000168874	ATOH8	6.28633	2.45e-08
ENSG00000154655	L3MBTL4	6.57806	2.49e-08
ENSG00000197020	ZNF100	10.2572	2.49e-08
ENSG00000181982	CCDC149	-10.2512	2.49e-08
ENSG00000147010	SH3KBP1	-5.83719	2.5e-08
ENSG00000263244	AC087190.3	-5.70295	2.52e-08
ENSG00000162009	SSTR5	10.2463	2.59e-08
ENSG00000228799	LINC01939	10.2463	2.59e-08
ENSG00000213022	KLK9	-10.2344	2.59e-08
ENSG00000187627	RGPD1	-6.12915	2.61e-08
ENSG00000170577	SIX2	5.98156	2.62e-08
ENSG00000280837	CPS1-IT1	10.2354	2.7e-08
ENSG00000100092	SH3BP1	-5.78023	2.71e-08
ENSG00000204291	COL15A1	6.55287	2.8e-08
ENSG00000132692	BCAN	10.2243	2.81e-08
ENSG00000109193	SULT1E1	-10.2173	2.81e-08
ENSG00000119508	NR4A3	6.19581	2.87e-08
ENSG00000183092	BEGAIN	5.71673	2.87e-08
ENSG00000229618	AC011287.1	-6.44896	2.87e-08
ENSG00000101825	MXRA5	-5.6925	2.89e-08
ENSG00000138207	RBP4	10.2132	2.92e-08
ENSG00000151468	CCDC3	-10.2087	2.92e-08
ENSG00000121858	TNFSF10	-6.02552	2.97e-08
ENSG00000259583	AC015712.2	-5.68281	3e-08
ENSG00000131127	ZNF141	-5.82411	3.04e-08
ENSG00000250682	LINC00491	-10.2001	3.04e-08
ENSG00000267432	DNAH17-AS1	5.75051	3.09e-08
ENSG00000163637	PRICKLE2	-6.16733	3.14e-08
ENSG00000091831	ESR1	10.202	3.17e-08
ENSG00000095777	MYO3A	-10.1914	3.17e-08
ENSG00000175928	LRRN1	-5.9557	3.23e-08
ENSG00000254870	ATP6V1G2-DDX39B	10.1907	3.3e-08
ENSG00000243414	TICAM2	-10.1826	3.3e-08
ENSG00000164616	FBXL21P	-10.1826	3.3e-08
ENSG00000110400	NECTIN1	-5.61427	3.38e-08
ENSG00000169991	IFFO2	-5.60603	3.41e-08
ENSG00000272347	AC116351.2	10.1793	3.44e-08
ENSG00000008311	AASS	-10.1738	3.44e-08
ENSG00000149256	TENM4	-10.1738	3.44e-08
ENSG00000223553	SMPD4P1	-10.1649	3.44e-08
ENSG00000175707	KDF1	-6.25346	3.5e-08
ENSG00000114948	ADAM23	-6.05587	3.54e-08
ENSG00000104848	KCNA7	-10.156	3.58e-08
ENSG00000184564	SLITRK6	-5.74501	3.67e-08
ENSG00000121743	GJA3	-10.147	3.74e-08
ENSG00000186153	WWOX	-5.91585	3.8e-08
ENSG00000157214	STEAP2	-6.22758	3.85e-08
ENSG00000189221	MAOA	-5.9118	3.87e-08
ENSG00000281832	LINC00602	10.1445	3.89e-08
ENSG00000176153	GPX2	-5.84005	3.95e-08
ENSG00000167363	FN3K	5.74608	3.99e-08
ENSG00000162415	ZSWIM5	5.82167	4.02e-08
ENSG00000258130	AC106782.1	10.1328	4.06e-08
ENSG00000163661	PTX3	-10.1289	4.06e-08
ENSG00000139211	AMIGO2	-5.60566	4.06e-08
ENSG00000143850	PLEKHA6	5.58593	4.08e-08
ENSG00000178401	DNAJC22	5.84309	4.09e-08
ENSG00000206538	VGLL3	5.73225	4.13e-08
ENSG00000135074	ADAM19	-6.57219	4.18e-08
ENSG00000108984	MAP2K6	5.53426	4.3e-08
ENSG00000165905	LARGE2	-6.20417	4.3e-08
ENSG00000148357	HMCN2	6.15122	4.33e-08
ENSG00000197915	HRNR	-6.00324	4.39e-08
ENSG00000226258	GRM7-AS3	10.1209	4.42e-08
ENSG00000130700	GATA5	10.1209	4.42e-08
ENSG00000186777	ZNF732	-10.1105	4.42e-08
ENSG00000229647	MYOSLID	-10.1105	4.42e-08
ENSG00000170962	PDGFD	-10.1105	4.42e-08
ENSG00000229689	AC009237.3	-10.1105	4.42e-08
ENSG00000251257	AC010457.1	6.14261	4.46e-08
ENSG00000099284	MACROH2A2	-5.69305	4.54e-08
ENSG00000213801	ZNF321P	10.109	4.62e-08
ENSG00000108947	EFNB3	-10.1012	4.62e-08
ENSG00000132517	SLC52A1	-10.1012	4.62e-08
ENSG00000138675	FGF5	-10.0919	4.62e-08
ENSG00000123358	NR4A1	5.50812	4.64e-08
ENSG00000239911	PRKAG2-AS1	10.0969	4.82e-08
ENSG00000251620	STPG2-AS1	-10.0825	4.82e-08
ENSG00000277918	RNVU1-28	-6.06239	4.91e-08
ENSG00000213694	S1PR3	-6.16531	5.02e-08
ENSG00000237671	GAGE12C	10.0847	5.04e-08
ENSG00000086717	PPEF1	10.0847	5.04e-08
ENSG00000282304	AC140479.5	-10.0731	5.04e-08
ENSG00000151150	ANK3	-5.66532	5.11e-08
ENSG00000206652	RNU1-1	-5.5069	5.15e-08
ENSG00000213186	TRIM59	-5.55531	5.2e-08
ENSG00000188263	IL17REL	10.0725	5.26e-08
ENSG00000179178	TMEM125	-10.0636	5.26e-08
ENSG00000197249	SERPINA1	-10.0636	5.26e-08
ENSG00000162804	SNED1	5.52444	5.34e-08
ENSG00000259295	CSPG4P12	10.0601	5.5e-08
ENSG00000163864	NMNAT3	-10.054	5.5e-08
ENSG00000225614	ZNF469	5.48252	5.54e-08
ENSG00000175040	CHST2	5.76971	5.59e-08
ENSG00000033170	FUT8	-5.47772	5.66e-08
ENSG00000287778	AC006230.1	-10.0443	5.75e-08
ENSG00000141526	SLC16A3	5.46067	5.86e-08
ENSG00000272620	AFAP1-AS1	-5.47162	5.87e-08
ENSG00000159674	SPON2	5.5275	5.97e-08
ENSG00000253313	C1orf210	-10.0346	6.01e-08
ENSG00000260816	AC027279.1	-10.0346	6.01e-08
ENSG00000114378	HYAL1	5.58337	6.13e-08
ENSG00000166676	TVP23A	6.0129	6.16e-08
ENSG00000134376	CRB1	10.035	6.29e-08
ENSG00000243766	HOTTIP	10.035	6.29e-08
ENSG00000166352	C11orf74	-10.0249	6.29e-08
ENSG00000088386	SLC15A1	-10.0249	6.29e-08
ENSG00000170837	GPR27	-10.0249	6.29e-08
ENSG00000162444	RBP7	-10.0249	6.29e-08
ENSG00000088726	TMEM40	-6.25372	6.37e-08
ENSG00000154277	UCHL1	-5.45757	6.42e-08
ENSG00000282864	AL356118.1	10.0223	6.59e-08
ENSG00000221866	PLXNA4	-10.015	6.59e-08
ENSG00000215386	MIR99AHG	6.04434	6.7e-08
ENSG00000237864	LINC00322	10.0095	6.89e-08
ENSG00000277837	AC090340.1	10.0095	6.89e-08
ENSG00000247095	MIR210HG	10.0095	6.89e-08
ENSG00000006377	DLX6	-9.99514	6.89e-08
ENSG00000112761	CCN6	-9.99514	6.89e-08
ENSG00000204397	CARD16	5.72731	6.9e-08
ENSG00000170571	EMB	-5.44975	7.45e-08
ENSG00000066468	FGFR2	-5.62699	7.49e-08
ENSG00000198237	AC131392.1	9.98354	7.56e-08
ENSG00000220868	MRPL35P1	9.98354	7.56e-08
ENSG00000285816	AP000944.5	6.85677	7.81e-08
ENSG00000173376	NDNF	9.97038	7.93e-08
ENSG00000197921	HES5	9.97038	7.93e-08
ENSG00000140284	SLC27A2	5.68914	8.09e-08
ENSG00000241431	RPL37P6	6.15414	8.28e-08
ENSG00000124813	RUNX2	-5.45237	8.29e-08
ENSG00000286546	AL079338.1	9.9571	8.31e-08
ENSG00000264596	AP000897.1	9.9571	8.31e-08
ENSG00000154310	TNIK	-9.95453	8.31e-08
ENSG00000227722	AL022100.1	-9.95453	8.31e-08
ENSG00000009950	MLXIPL	5.51057	8.42e-08
ENSG00000251209	LINC00923	-5.92547	8.64e-08
ENSG00000138028	CGREF1	-9.9442	8.72e-08
ENSG00000214336	FOXI3	-9.9442	8.72e-08
ENSG00000178199	ZC3H12D	9.94369	8.72e-08
ENSG00000234147	AL035446.1	9.94369	8.72e-08
ENSG00000272602	ZNF595	-5.83549	8.78e-08
ENSG00000137261	KIAA0319	5.97328	8.97e-08
ENSG00000197444	OGDHL	-9.9338	9.14e-08
ENSG00000242193	CRYZL2P	-9.9338	9.14e-08
ENSG00000133863	TEX15	-9.92332	9.14e-08
ENSG00000167642	SPINT2	-5.35628	9.39e-08
ENSG00000127585	FBXL16	5.42825	9.53e-08
ENSG00000185561	TLCD2	9.93016	9.6e-08
ENSG00000180787	ZFP3	-9.91276	9.6e-08
ENSG00000163735	CXCL5	-9.91276	9.6e-08
ENSG00000286070	GGT1	-6.69711	9.98e-08
ENSG00000254266	PKIA-AS1	-9.90212	1.01e-07
ENSG00000109511	ANXA10	-9.90212	1.01e-07
ENSG00000149243	KLHL35	5.39483	1.02e-07
ENSG00000142149	HUNK	5.51628	1.02e-07
ENSG00000259345	AC013652.1	-6.68692	1.05e-07
ENSG00000158050	DUSP2	5.88112	1.06e-07
ENSG00000242759	LINC00882	9.90271	1.06e-07
ENSG00000287271	AC011455.6	-9.89141	1.06e-07
ENSG00000231298	MANCR	-9.89141	1.06e-07
ENSG00000115290	GRB14	-9.89141	1.06e-07
ENSG00000102271	KLHL4	-9.89141	1.06e-07
ENSG00000244968	LIFR-AS1	5.59069	1.08e-07
ENSG00000198624	CCDC69	-5.97791	1.09e-07
ENSG00000261888	AC144831.1	6.21835	1.09e-07
ENSG00000186472	PCLO	-5.47091	1.1e-07
ENSG00000071991	CDH19	9.88878	1.11e-07
ENSG00000225978	HAR1A	9.88878	1.11e-07
ENSG00000253819	LINC01151	-9.88061	1.11e-07
ENSG00000188001	TPRG1	-9.88061	1.11e-07
ENSG00000237713	AC011287.2	-9.88061	1.11e-07
ENSG00000064195	DLX3	-9.86973	1.17e-07
ENSG00000270025	BMS1P7	-9.86973	1.17e-07
ENSG00000204789	ZNF204P	-9.86973	1.17e-07
ENSG00000162894	FCMR	-9.85877	1.23e-07
ENSG00000115828	QPCT	-9.85877	1.23e-07
ENSG00000175745	NR2F1	5.46816	1.23e-07
ENSG00000117407	ARTN	-5.37076	1.26e-07
ENSG00000255508	AP002990.1	5.32127	1.29e-07
ENSG00000158125	XDH	-5.47612	1.29e-07
ENSG00000243137	PSG4	-9.84773	1.29e-07
ENSG00000170396	ZNF804A	9.84618	1.29e-07
ENSG00000288054	AL360178.2	9.84618	1.29e-07
ENSG00000197479	PCDHB11	-9.8366	1.29e-07
ENSG00000113504	SLC12A7	5.2838	1.31e-07
ENSG00000232803	SLCO4A1-AS1	5.72867	1.31e-07
ENSG00000181333	HEPHL1	-5.51242	1.32e-07
ENSG00000140832	MARVELD3	-5.51099	1.33e-07
ENSG00000261804	AC007342.4	-9.82539	1.36e-07
ENSG00000113361	CDH6	-5.91443	1.42e-07
ENSG00000230615	AL139220.2	5.80808	1.42e-07
ENSG00000184698	OR51M1	9.8317	1.43e-07
ENSG00000276317	AL357033.3	9.8317	1.43e-07
ENSG00000177679	SRRM3	-9.81408	1.43e-07
ENSG00000134716	CYP2J2	-9.81408	1.43e-07
ENSG00000147180	ZNF711	-9.81408	1.43e-07
ENSG00000163171	CDC42EP3	-5.26485	1.45e-07
ENSG00000134569	LRP4	-5.46421	1.47e-07
ENSG00000257950	P2RX5-TAX1BP3	-5.26936	1.48e-07
ENSG00000113594	LIFR	5.22306	1.48e-07
ENSG00000012779	ALOX5	9.81707	1.51e-07
ENSG00000274847	MAFIP	9.81707	1.51e-07
ENSG00000236081	ELFN1-AS1	9.81707	1.51e-07
ENSG00000170516	COX7B2	9.81707	1.51e-07
ENSG00000082397	EPB41L3	9.81707	1.51e-07
ENSG00000279128	AC078925.2	9.81707	1.51e-07
ENSG00000149150	SLC43A1	9.81707	1.51e-07
ENSG00000226539	AC012512.1	-9.80269	1.51e-07
ENSG00000243629	LINC00880	-9.80269	1.51e-07
ENSG00000101187	SLCO4A1	5.21709	1.54e-07
ENSG00000184922	FMNL1	5.25697	1.54e-07
ENSG00000204131	NHSL2	-6.03613	1.56e-07
ENSG00000286221	AC009070.1	9.80229	1.59e-07
ENSG00000142303	ADAMTS10	6.68032	1.61e-07
ENSG00000258498	DIO3OS	6.11888	1.66e-07
ENSG00000234311	AL451069.3	9.78735	1.68e-07
ENSG00000262714	AC007342.5	-9.77964	1.68e-07
ENSG00000180662	RPL21P8	-9.77964	1.68e-07
ENSG00000121440	PDZRN3	-9.77964	1.68e-07
ENSG00000250208	FZD10-AS1	5.25302	1.7e-07
ENSG00000157570	TSPAN18	5.49027	1.71e-07
ENSG00000137801	THBS1	-5.17871	1.73e-07
ENSG00000153071	DAB2	5.19915	1.74e-07
ENSG00000238125	SLC9A3P2	-5.86305	1.74e-07
ENSG00000107099	DOCK8	5.30124	1.75e-07
ENSG00000196189	SEMA4A	-5.4807	1.75e-07
ENSG00000150672	DLG2	5.75077	1.81e-07
ENSG00000120129	DUSP1	5.16643	1.83e-07
ENSG00000235947	EGOT	9.75701	1.87e-07
ENSG00000240225	ZNF542P	-9.7562	1.87e-07
ENSG00000239713	APOBEC3G	-9.74434	1.87e-07
ENSG00000207513	RNU1-3	-5.18511	1.93e-07
ENSG00000167755	KLK6	-5.57354	1.93e-07
ENSG00000246082	NUDT16P1	6.08414	1.94e-07
ENSG00000167232	ZNF91	5.31098	1.94e-07
ENSG00000006638	TBXA2R	5.69205	1.94e-07
ENSG00000176697	BDNF	5.2761	1.94e-07
ENSG00000253686	LINC01484	5.7814	1.97e-07
ENSG00000184702	SEPTIN5	9.7416	1.97e-07
ENSG00000278905	AC106818.1	9.7416	1.97e-07
ENSG00000227082	LINC02798	9.7416	1.97e-07
ENSG00000258150	AC133555.3	9.7416	1.97e-07
ENSG00000180287	PLD5	-9.73238	1.97e-07
ENSG00000281131	SCHLAP1	-9.73238	1.97e-07
ENSG00000106991	ENG	5.24652	2.02e-07
ENSG00000133134	BEX2	-9.72033	2.08e-07
ENSG00000130768	SMPDL3B	-9.72033	2.08e-07
ENSG00000137462	TLR2	-5.96865	2.09e-07
ENSG00000139044	B4GALNT3	-5.62361	2.09e-07
ENSG00000268916	CSAG3	-6.16731	2.18e-07
ENSG00000166770	ZNF667-AS1	9.72602	2.2e-07
ENSG00000260228	AC009119.1	-9.70817	2.2e-07
ENSG00000163293	NIPAL1	-5.2731	2.23e-07
ENSG00000154736	ADAMTS5	5.42553	2.25e-07
ENSG00000261115	TMEM178B	5.42582	2.3e-07
ENSG00000072182	ASIC4	9.71028	2.32e-07
ENSG00000285943	AC112128.1	9.71028	2.32e-07
ENSG00000174370	C11orf45	-9.6959	2.32e-07
ENSG00000283703	VSIG10L2	9.69435	2.46e-07
ENSG00000134323	MYCN	9.69435	2.46e-07
ENSG00000279991	AC009044.1	-9.68353	2.46e-07
ENSG00000174500	GCSAM	-9.68353	2.46e-07
ENSG00000185100	ADSS1	5.30252	2.49e-07
ENSG00000105647	PIK3R2	-5.21847	2.5e-07
ENSG00000188620	HMX3	5.72484	2.51e-07
ENSG00000185261	KIAA0825	5.72484	2.51e-07
ENSG00000175414	ARL10	-5.16437	2.53e-07
ENSG00000148204	CRB2	5.59442	2.54e-07
ENSG00000134830	C5AR2	9.67825	2.6e-07
ENSG00000254632	AP003119.1	9.67825	2.6e-07
ENSG00000174586	ZNF497	9.67825	2.6e-07
ENSG00000142182	DNMT3L	9.67825	2.6e-07
ENSG00000273906	AC011297.1	-9.67106	2.6e-07
ENSG00000124374	PAIP2B	-9.67106	2.6e-07
ENSG00000273173	SNURF	7.13015	2.62e-07
ENSG00000053747	LAMA3	-5.077	2.64e-07
ENSG00000090339	ICAM1	5.15476	2.64e-07
ENSG00000186487	MYT1L	9.66197	2.75e-07
ENSG00000129946	SHC2	9.66197	2.75e-07
ENSG00000286890	AC055840.1	-9.65847	2.75e-07
ENSG00000288062	AL136981.3	-9.65847	2.75e-07
ENSG00000233532	LINC00460	-9.65847	2.75e-07
ENSG00000171435	KSR2	-9.65847	2.75e-07
ENSG00000261183	SPINT1-AS1	-9.64578	2.75e-07
ENSG00000156218	ADAMTSL3	-9.64578	2.75e-07
ENSG00000227496	AC099066.2	-9.64578	2.75e-07
ENSG00000244086	AC110749.1	-9.64578	2.75e-07
ENSG00000226674	TEX41	-5.48663	2.78e-07
ENSG00000101846	STS	5.08584	2.8e-07
ENSG00000135925	WNT10A	-5.25137	2.81e-07
ENSG00000187689	AMTN	-5.74231	2.85e-07
ENSG00000109452	INPP4B	-5.13022	2.86e-07
ENSG00000250284	AC109439.2	9.6455	2.92e-07
ENSG00000262898	AC139099.2	9.6455	2.92e-07
ENSG00000231133	HAR1B	9.6455	2.92e-07
ENSG00000101955	SRPX	-5.73417	2.96e-07
ENSG00000156475	PPP2R2B	5.55137	3.01e-07
ENSG00000266921	AC006213.1	9.62885	3.09e-07
ENSG00000131982	UBE2L2	9.62885	3.09e-07
ENSG00000282997	AL162456.1	9.62885	3.09e-07
ENSG00000230943	LINC02541	-9.62005	3.09e-07
ENSG00000100505	TRIM9	-9.62005	3.09e-07
ENSG00000230922	AL079301.1	-9.62005	3.09e-07
ENSG00000177822	TENM3-AS1	-9.60701	3.28e-07
ENSG00000114771	AADAC	-9.60701	3.28e-07
ENSG00000100985	MMP9	-5.14765	3.34e-07
ENSG00000088756	ARHGAP28	5.22755	3.38e-07
ENSG00000259075	POC1B-GALNT4	-6.72336	3.38e-07
ENSG00000242268	LINC02082	9.61199	3.48e-07
ENSG00000138792	ENPEP	-9.59385	3.48e-07
ENSG00000233844	KCNQ5-IT1	-9.59385	3.48e-07
ENSG00000002079	MYH16	-9.59385	3.48e-07
ENSG00000243232	PCDHAC2	5.93614	3.51e-07
ENSG00000172671	ZFAND4	-5.68429	3.58e-07
ENSG00000105246	EBI3	5.34666	3.61e-07
ENSG00000205336	ADGRG1	-5.03614	3.66e-07
ENSG00000183251	OR51B4	9.59494	3.69e-07
ENSG00000286313	AL360178.1	9.59494	3.69e-07
ENSG00000287051	AC121757.2	9.59494	3.69e-07
ENSG00000183578	TNFAIP8L3	-9.58057	3.69e-07
ENSG00000214435	AS3MT	-9.58057	3.69e-07
ENSG00000065675	PRKCQ	-9.58057	3.69e-07
ENSG00000217624	AL627402.1	-9.58057	3.69e-07
ENSG00000187566	NHLRC1	-9.58057	3.69e-07
ENSG00000131400	NAPSA	-9.58057	3.69e-07
ENSG00000134184	GSTM1	5.09382	3.73e-07
ENSG00000276612	FP565260.2	5.52718	3.82e-07
ENSG00000188042	ARL4C	-5.1077	3.82e-07
ENSG00000286715	AL589863.2	9.57769	3.93e-07
ENSG00000111186	WNT5B	-9.56717	3.93e-07
ENSG00000130054	FAM155B	-9.56717	3.93e-07
ENSG00000121207	LRAT	-9.56717	3.93e-07
ENSG00000137747	TMPRSS13	-9.56717	3.93e-07
ENSG00000207005	RNU1-2	-5.02585	3.98e-07
ENSG00000166446	CDYL2	4.9989	3.99e-07
ENSG00000196814	MVB12B	-5.39843	4.01e-07
ENSG00000156299	TIAM1	-5.27502	4.05e-07
ENSG00000248449	PCDHGB8P	-6.34846	4.17e-07
ENSG00000152661	GJA1	-5.07315	4.17e-07
ENSG00000198003	CCDC151	9.56022	4.17e-07
ENSG00000228705	LINC00659	9.56022	4.17e-07
ENSG00000286512	AL031768.2	9.56022	4.17e-07
ENSG00000237880	LINC01885	9.56022	4.17e-07
ENSG00000118156	ZNF541	9.56022	4.17e-07
ENSG00000152092	ASTN1	9.56022	4.17e-07
ENSG00000205517	RGL3	5.25943	4.29e-07
ENSG00000278384	AL354822.1	5.65949	4.32e-07
ENSG00000141576	RNF157	5.29619	4.39e-07
ENSG00000283097	AL159152.1	9.54254	4.44e-07
ENSG00000075043	KCNQ2	9.54254	4.44e-07
ENSG00000198185	ZNF334	-9.53998	4.44e-07
ENSG00000154165	GPR15	-9.52619	4.44e-07
ENSG00000133687	TMTC1	4.973	4.45e-07
ENSG00000163032	VSNL1	-5.23957	4.67e-07
ENSG00000173838	MARCHF10	9.52465	4.72e-07
ENSG00000180875	GREM2	9.52465	4.72e-07
ENSG00000236627	AL590302.2	9.52465	4.72e-07
ENSG00000183535	COL18A1-AS1	-9.51227	4.72e-07
ENSG00000100628	ASB2	-9.51227	4.72e-07
ENSG00000225091	SNORA71A	-5.18174	4.74e-07
ENSG00000207389	RNU1-4	-4.97744	4.77e-07
ENSG00000112139	MDGA1	-5.11393	4.78e-07
ENSG00000198121	LPAR1	-5.35222	4.81e-07
ENSG00000120594	PLXDC2	-5.1527	4.86e-07
ENSG00000285612	AC004974.1	-5.9705	4.92e-07
ENSG00000187918	OR51I2	9.50652	5.03e-07
ENSG00000196368	NUDT11	-9.49822	5.03e-07
ENSG00000256450	AC007552.1	-9.49822	5.03e-07
ENSG00000259399	TGIF2-RAB5IF	6.96915	5.05e-07
ENSG00000286134	AC114930.1	5.45557	5.11e-07
ENSG00000121005	CRISPLD1	-5.02727	5.12e-07
ENSG00000169429	CXCL8	-4.93137	5.23e-07
ENSG00000197142	ACSL5	5.5405	5.3e-07
ENSG00000215196	BASP1-AS1	5.2118	5.35e-07
ENSG00000143184	XCL1	-9.48402	5.36e-07
ENSG00000197496	SLC2A10	-9.48402	5.36e-07
ENSG00000118004	COLEC11	-9.48402	5.36e-07
ENSG00000184599	TAFA3	-9.48402	5.36e-07
ENSG00000272668	AL590560.3	5.01341	5.37e-07
ENSG00000196154	S100A4	4.91223	5.49e-07
ENSG00000102145	GATA1	9.48817	5.72e-07
ENSG00000179148	ALOXE3	-9.46969	5.72e-07
ENSG00000165568	AKR1E2	-9.46969	5.72e-07
ENSG00000114405	C3orf14	-5.56992	5.72e-07
ENSG00000127954	STEAP4	5.09344	5.81e-07
ENSG00000167766	ZNF83	5.04323	5.82e-07
ENSG00000186088	GSAP	-5.3714	5.83e-07
ENSG00000120756	PLS1	-5.18703	5.84e-07
ENSG00000198885	ITPRIPL1	-5.56533	5.84e-07
ENSG00000253846	PCDHGA10	-5.35507	5.86e-07
ENSG00000268686	AC010643.1	9.46958	6.1e-07
ENSG00000179954	SSC5D	9.46958	6.1e-07
ENSG00000269096	CT45A3	9.46958	6.1e-07
ENSG00000232759	AC002480.1	-9.45521	6.1e-07
ENSG00000175746	C15orf54	-9.45521	6.1e-07
ENSG00000272141	AL390719.2	-9.45521	6.1e-07
ENSG00000115339	GALNT3	-4.90584	6.26e-07
ENSG00000275405	AC213203.2	-4.8994	6.42e-07
ENSG00000136305	CIDEB	9.45075	6.51e-07
ENSG00000274391	TPTE	9.45075	6.51e-07
ENSG00000239828	AC063944.1	9.45075	6.51e-07
ENSG00000136425	CIB2	-9.44058	6.51e-07
ENSG00000164120	HPGD	-9.44058	6.51e-07
ENSG00000185607	ACTBP7	-9.44058	6.51e-07
ENSG00000287929	AL354953.1	-9.44058	6.51e-07
ENSG00000197584	KCNMB2	-9.44058	6.51e-07
ENSG00000062282	DGAT2	5.06284	6.53e-07
ENSG00000170214	ADRA1B	-5.53282	6.64e-07
ENSG00000276122	AC026336.3	5.48027	6.72e-07
ENSG00000189337	KAZN	-5.26939	6.73e-07
ENSG00000197355	UAP1L1	4.93273	6.74e-07
ENSG00000157445	CACNA2D3	6.3241	6.77e-07
ENSG00000274750	H3C6	-4.87482	6.92e-07
ENSG00000256151	ADGRD1-AS1	9.43167	6.96e-07
ENSG00000105852	PON3	-9.42581	6.96e-07
ENSG00000166923	GREM1	-9.42581	6.96e-07
ENSG00000280190	AC027279.4	-9.42581	6.96e-07
ENSG00000255310	AF131215.5	-9.42581	6.96e-07
ENSG00000149054	ZNF215	-9.42581	6.96e-07
ENSG00000064692	SNCAIP	-9.41088	6.96e-07
ENSG00000163040	CCDC74A	-9.41088	6.96e-07
ENSG00000174837	ADGRE1	-9.41088	6.96e-07
ENSG00000166394	CYB5R2	-9.41088	6.96e-07
ENSG00000106541	AGR2	-9.41088	6.96e-07
ENSG00000206596	RNU1-27P	-4.90492	6.98e-07
ENSG00000198780	FAM169A	-4.94747	7.13e-07
ENSG00000115526	CHST10	-5.25512	7.18e-07
ENSG00000089356	FXYD3	-4.99758	7.29e-07
ENSG00000252699	SNORA21B	-6.20586	7.29e-07
ENSG00000229154	KCNQ5-AS1	-9.3958	7.44e-07
ENSG00000242419	PCDHGC4	-9.3958	7.44e-07
ENSG00000161551	ZNF577	-9.3958	7.44e-07
ENSG00000118971	CCND2	-4.97014	7.45e-07
ENSG00000198744	MTCO3P12	-5.85793	7.6e-07
ENSG00000287762	AC108050.1	5.73807	7.6e-07
ENSG00000166816	LDHD	5.16173	7.68e-07
ENSG00000109321	AREG	-4.88474	7.69e-07
ENSG00000156113	KCNMA1	-5.64038	7.79e-07
ENSG00000162738	VANGL2	-5.14437	7.94e-07
ENSG00000012223	LTF	9.39273	7.96e-07
ENSG00000084453	SLCO1A2	-9.38055	7.96e-07
ENSG00000105639	JAK3	5.09169	8.33e-07
ENSG00000125730	C3	4.79783	8.4e-07
ENSG00000084710	EFR3B	4.94347	8.52e-07
ENSG00000287387	AC010883.3	9.37286	8.52e-07
ENSG00000006071	ABCC8	9.37286	8.52e-07
ENSG00000261377	PDCD6IPP2	-9.36514	8.52e-07
ENSG00000258608	DNAJC19P9	-9.36514	8.52e-07
ENSG00000071909	MYO3B	-9.36514	8.52e-07
ENSG00000154227	CERS3	-9.36514	8.52e-07
ENSG00000258932	AL390334.1	-9.36514	8.52e-07
ENSG00000280208	GGT4P	-9.36514	8.52e-07
ENSG00000255666	LINC02700	-9.36514	8.52e-07
ENSG00000155265	GOLGA7B	-5.61854	8.6e-07
ENSG00000268104	SLC6A14	5.41742	8.6e-07
ENSG00000170485	NPAS2	4.82242	8.65e-07
ENSG00000169918	OTUD7A	5.11882	9.1e-07
ENSG00000254560	BBOX1-AS1	-9.34957	9.13e-07
ENSG00000124875	CXCL6	-9.34957	9.13e-07
ENSG00000237807	AC022034.1	-9.34957	9.13e-07
ENSG00000263753	LINC00667	4.89132	9.14e-07
ENSG00000200997	RNU1-85P	5.39584	9.53e-07
ENSG00000186832	KRT16	-4.8319	9.53e-07
ENSG00000203999	LINC01270	5.08849	9.79e-07
ENSG00000164385	LINC01600	9.35271	9.8e-07
ENSG00000135333	EPHA7	9.35271	9.8e-07
ENSG00000268108	AC008687.2	-9.33383	9.8e-07
ENSG00000180739	S1PR5	-9.33383	9.8e-07
ENSG00000143502	SUSD4	-9.33383	9.8e-07
ENSG00000180155	LYNX1	-9.33383	9.8e-07
ENSG00000242732	RTL5	-9.33383	9.8e-07
ENSG00000286403	AC010378.2	-9.33383	9.8e-07
ENSG00000114790	ARHGEF26	-9.33383	9.8e-07
ENSG00000167680	SEMA6B	-4.93746	9.8e-07
ENSG00000131089	ARHGEF9	-5.05049	1.01e-06
ENSG00000136114	THSD1	-5.21761	1.03e-06
ENSG00000131094	C1QL1	4.95076	1.04e-06
ENSG00000237986	CELF2-AS2	9.33228	1.05e-06
ENSG00000250816	DCAF13P2	9.33228	1.05e-06
ENSG00000154134	ROBO3	-9.31791	1.05e-06
ENSG00000224055	GAPDHP55	-9.31791	1.05e-06
ENSG00000269918	AF131215.6	-9.31791	1.05e-06
ENSG00000169896	ITGAM	-9.31791	1.05e-06
ENSG00000242147	LINC02657	-9.31791	1.05e-06
ENSG00000186854	TRABD2A	4.77201	1.05e-06
ENSG00000115112	TFCP2L1	-5.15485	1.08e-06
ENSG00000184828	ZBTB7C	4.88348	1.1e-06
ENSG00000267280	TBX2-AS1	9.31155	1.13e-06
ENSG00000126838	PZP	9.31155	1.13e-06
ENSG00000287300	AL080275.1	9.31155	1.13e-06
ENSG00000185015	CA13	-9.30182	1.13e-06
ENSG00000243135	UGT1A3	-9.28554	1.13e-06
ENSG00000272410	AC022384.1	-9.28554	1.13e-06
ENSG00000124343	XG	-9.28554	1.13e-06
ENSG00000206585	RNVU1-7	-4.75412	1.13e-06
ENSG00000202058	RN7SKP80	-4.76756	1.16e-06
ENSG00000064042	LIMCH1	4.72218	1.17e-06
ENSG00000133477	FAM83F	-4.83947	1.17e-06
ENSG00000168646	AXIN2	5.63383	1.19e-06
ENSG00000100285	NEFH	5.01539	1.19e-06
ENSG00000172201	ID4	-5.12767	1.2e-06
ENSG00000285781	AL117340.1	9.29053	1.21e-06
ENSG00000168702	LRP1B	9.29053	1.21e-06
ENSG00000225492	GBP1P1	-9.26908	1.21e-06
ENSG00000279887	AC046158.4	-9.26908	1.21e-06
ENSG00000273045	C2orf15	-9.26908	1.21e-06
ENSG00000173597	SULT1B1	-9.26908	1.21e-06
ENSG00000167080	B4GALNT2	4.86115	1.23e-06
ENSG00000171346	KRT15	-4.78145	1.23e-06
ENSG00000138623	SEMA7A	-5.10613	1.29e-06
ENSG00000239920	AC104389.5	9.26919	1.31e-06
ENSG00000146374	RSPO3	9.26919	1.31e-06
ENSG00000273274	ZBTB8B	-9.25243	1.31e-06
ENSG00000162069	BICDL2	-9.25243	1.31e-06
ENSG00000144583	MARCHF4	-9.25243	1.31e-06
ENSG00000129595	EPB41L4A	4.99852	1.31e-06
ENSG00000128872	TMOD2	-5.50404	1.34e-06
ENSG00000164674	SYTL3	-4.92524	1.34e-06
ENSG00000156500	FAM122C	4.99021	1.35e-06
ENSG00000183691	NOG	4.83243	1.37e-06
ENSG00000179542	SLITRK4	5.17954	1.37e-06
ENSG00000189350	TOGARAM2	4.98185	1.39e-06
ENSG00000163629	PTPN13	-5.04163	1.4e-06
ENSG00000110492	MDK	-4.91028	1.4e-06
ENSG00000248597	AC126768.1	9.24753	1.41e-06
ENSG00000285875	AL035446.2	9.24753	1.41e-06
ENSG00000261821	AC090826.1	9.24753	1.41e-06
ENSG00000167359	OR51I1	9.24753	1.41e-06
ENSG00000188293	IGFL1	-9.23558	1.41e-06
ENSG00000149043	SYT8	-9.23558	1.41e-06
ENSG00000164796	CSMD3	-9.23558	1.41e-06
ENSG00000173432	SAA1	-9.23558	1.41e-06
ENSG00000166313	APBB1	-9.23558	1.41e-06
ENSG00000119888	EPCAM	-4.69041	1.41e-06
ENSG00000162409	PRKAA2	4.69905	1.43e-06
ENSG00000109099	PMP22	4.71881	1.47e-06
ENSG00000113389	NPR3	4.69986	1.51e-06
ENSG00000236532	LINC01695	9.22554	1.52e-06
ENSG00000280302	AP005264.7	9.22554	1.52e-06
ENSG00000157613	CREB3L1	9.22554	1.52e-06
ENSG00000141040	ZNF287	-9.21854	1.52e-06
ENSG00000231183	AC007003.1	-9.21854	1.52e-06
ENSG00000184497	TMEM255B	-9.21854	1.52e-06
ENSG00000189334	S100A14	-4.68652	1.53e-06
ENSG00000167772	ANGPTL4	4.70841	1.56e-06
ENSG00000258818	RNASE4	5.42608	1.56e-06
ENSG00000227954	TARID	5.21398	1.6e-06
ENSG00000006047	YBX2	4.97652	1.62e-06
ENSG00000285292	ABCF2	9.20321	1.64e-06
ENSG00000120332	TNN	9.20321	1.64e-06
ENSG00000261713	SSTR5-AS1	9.20321	1.64e-06
ENSG00000206077	ZDHHC11B	9.20321	1.64e-06
ENSG00000165556	CDX2	-9.20129	1.64e-06
ENSG00000250135	AL049795.2	-9.20129	1.64e-06
ENSG00000285238	AC006064.6	-9.20129	1.64e-06
ENSG00000232229	LINC00865	-9.20129	1.64e-06
ENSG00000156140	ADAMTS3	-9.20129	1.64e-06
ENSG00000260733	AC046158.1	-9.20129	1.64e-06
ENSG00000159173	TNNI1	-9.20129	1.64e-06
ENSG00000174939	ASPHD1	4.75404	1.66e-06
ENSG00000157551	KCNJ15	-5.03752	1.69e-06
ENSG00000164741	DLC1	-5.10696	1.72e-06
ENSG00000152495	CAMK4	-4.94732	1.75e-06
ENSG00000243207	PPAN-P2RY11	-9.18383	1.77e-06
ENSG00000163209	SPRR3	-9.18383	1.77e-06
ENSG00000258018	LINC02457	-9.18383	1.77e-06
ENSG00000142623	PADI1	-9.18383	1.77e-06
ENSG00000198857	HSD3BP5	-9.18383	1.77e-06
ENSG00000287586	Z98886.1	-9.18383	1.77e-06
ENSG00000157851	DPYSL5	-9.18383	1.77e-06
ENSG00000214822	KRT16P3	-9.18383	1.77e-06
ENSG00000161149	TUBA3FP	-9.18383	1.77e-06
ENSG00000258537	FRMD6-AS2	-9.18383	1.77e-06
ENSG00000143631	FLG	-4.69315	1.84e-06
ENSG00000125266	EFNB2	-4.63899	1.87e-06
ENSG00000181722	ZBTB20	4.66526	1.89e-06
ENSG00000180447	GAS1	4.74411	1.9e-06
ENSG00000287114	AC104024.3	9.18053	1.91e-06
ENSG00000233110	AC093797.1	9.18053	1.91e-06
ENSG00000250305	TRMT9B	9.18053	1.91e-06
ENSG00000237238	BMS1P10	-9.16616	1.91e-06
ENSG00000248370	LINC02434	-9.16616	1.91e-06
ENSG00000183760	ACP7	-9.16616	1.91e-06
ENSG00000253746	AC091182.2	-9.16616	1.91e-06
ENSG00000018869	ZNF582	-9.16616	1.91e-06
ENSG00000157111	TMEM171	-9.14827	1.91e-06
ENSG00000262503	AC027763.1	-9.14827	1.91e-06
ENSG00000103888	CEMIP	4.6154	1.99e-06
ENSG00000212747	RTL8B	4.70464	2.03e-06
ENSG00000204603	LINC01257	9.15748	2.07e-06
ENSG00000287536	AC012500.1	9.15748	2.07e-06
ENSG00000177511	ST8SIA3	9.15748	2.07e-06
ENSG00000171872	KLF17	9.15748	2.07e-06
ENSG00000288101	AL359987.1	-9.13015	2.07e-06
ENSG00000278561	PTPN20CP	-9.13015	2.07e-06
ENSG00000287106	AC106743.1	-9.13015	2.07e-06
ENSG00000119411	BSPRY	-9.13015	2.07e-06
ENSG00000107186	MPDZ	-4.71504	2.08e-06
ENSG00000117114	ADGRL2	-4.75493	2.11e-06
ENSG00000209582	SNORA48	-6.2573	2.14e-06
ENSG00000276600	RAB7B	-4.93451	2.16e-06
ENSG00000182141	ZNF708	5.18561	2.16e-06
ENSG00000138336	TET1	-4.89277	2.19e-06
ENSG00000130653	PNPLA7	9.13407	2.24e-06
ENSG00000204442	FAM155A	9.13407	2.24e-06
ENSG00000232885	GPC5-AS2	9.13407	2.24e-06
ENSG00000229956	ZRANB2-AS2	9.13407	2.24e-06
ENSG00000276223	AL118522.1	9.13407	2.24e-06
ENSG00000224945	AL353150.1	9.13407	2.24e-06
ENSG00000081803	CADPS2	9.13407	2.24e-06
ENSG00000280924	LINC00628	9.13407	2.24e-06
ENSG00000275549	STPG3-AS1	9.13407	2.24e-06
ENSG00000280200	AC073862.5	9.13407	2.24e-06
ENSG00000188883	KLRG2	-9.11181	2.24e-06
ENSG00000197506	SLC28A3	-9.11181	2.24e-06
ENSG00000047936	ROS1	-9.11181	2.24e-06
ENSG00000280027	AC007342.9	-9.11181	2.24e-06
ENSG00000137486	ARRB1	4.62007	2.26e-06
ENSG00000157992	KRTCAP3	-5.01375	2.3e-06
ENSG00000250722	SELENOP	5.01841	2.34e-06
ENSG00000151229	SLC2A13	4.56902	2.34e-06
ENSG00000240990	HOXA11-AS	5.037	2.41e-06
ENSG00000258927	AL133467.2	9.11026	2.43e-06
ENSG00000151572	ANO4	9.11026	2.43e-06
ENSG00000283740	TAF11L11	9.11026	2.43e-06
ENSG00000173253	DMRT2	-9.09323	2.43e-06
ENSG00000220908	LINC02531	-9.09323	2.43e-06
ENSG00000137474	MYO7A	-9.09323	2.43e-06
ENSG00000254788	CKLF-CMTM1	-9.09323	2.43e-06
ENSG00000255491	AC100858.3	-9.09323	2.43e-06
ENSG00000241484	ARHGAP8	-4.65658	2.43e-06
ENSG00000082074	FYB1	-4.90477	2.44e-06
ENSG00000213366	GSTM2	5.05982	2.5e-06
ENSG00000132026	RTBDN	5.44137	2.54e-06
ENSG00000070388	FGF22	5.44137	2.54e-06
ENSG00000101986	ABCD1	4.55754	2.56e-06
ENSG00000215833	QRSL1P1	-5.34017	2.59e-06
ENSG00000180116	C12orf40	9.08606	2.63e-06
ENSG00000256879	AC129102.1	9.08606	2.63e-06
ENSG00000160862	AZGP1	9.08606	2.63e-06
ENSG00000266767	AP000897.2	9.08606	2.63e-06
ENSG00000163794	UCN	9.08606	2.63e-06
ENSG00000156298	TSPAN7	-9.0744	2.63e-06
ENSG00000130208	APOC1	-9.0744	2.63e-06
ENSG00000236212	AC009262.1	-9.0744	2.63e-06
ENSG00000144152	FBLN7	5.42758	2.67e-06
ENSG00000157601	MX1	-4.80583	2.7e-06
ENSG00000008300	CELSR3	4.52376	2.74e-06
ENSG00000149380	P4HA3	5.00544	2.75e-06
ENSG00000181409	AATK	4.52138	2.79e-06
ENSG00000250645	AC010442.3	5.41365	2.8e-06
ENSG00000256238	SUPT16HP1	-4.65212	2.81e-06
ENSG00000250312	ZNF718	-5.17178	2.83e-06
ENSG00000248607	AC117422.1	9.06144	2.86e-06
ENSG00000271334	LINC02104	9.06144	2.86e-06
ENSG00000277987	LINC02351	9.06144	2.86e-06
ENSG00000228836	CT45A5	9.06144	2.86e-06
ENSG00000213260	YWHAZP5	-9.05533	2.86e-06
ENSG00000164484	TMEM200A	-9.05533	2.86e-06
ENSG00000260302	AP005482.2	-9.05533	2.86e-06
ENSG00000215146	BX322639.1	4.8305	2.86e-06
ENSG00000139725	RHOF	4.50563	2.88e-06
ENSG00000153404	PLEKHG4B	-4.62251	2.91e-06
ENSG00000101213	PTK6	4.52916	2.91e-06
ENSG00000103490	PYCARD	-4.90341	2.92e-06
ENSG00000163701	IL17RE	-5.05185	2.97e-06
ENSG00000164125	GASK1B	-4.94809	2.99e-06
ENSG00000245573	BDNF-AS	4.68913	3.01e-06
ENSG00000198105	ZNF248	4.78927	3.01e-06
ENSG00000113319	RASGRF2	-4.81016	3.05e-06
ENSG00000198400	NTRK1	5.38539	3.08e-06
ENSG00000049283	EPN3	-4.80688	3.09e-06
ENSG00000211448	DIO2	4.52407	3.1e-06
ENSG00000184925	LCN12	9.0364	3.11e-06
ENSG00000166896	ATP23	9.0364	3.11e-06
ENSG00000287865	AC099552.5	9.0364	3.11e-06
ENSG00000279197	AC010608.2	9.0364	3.11e-06
ENSG00000247011	AC005920.1	9.0364	3.11e-06
ENSG00000099834	CDHR5	9.0364	3.11e-06
ENSG00000280650	KCNIP4-IT1	-9.036	3.11e-06
ENSG00000173124	ACSM6	-9.036	3.11e-06
ENSG00000236348	PSMC1P10	-9.036	3.11e-06
ENSG00000287469	AC044798.3	-9.036	3.11e-06
ENSG00000131242	RAB11FIP4	-4.68511	3.21e-06
ENSG00000258674	AC011448.1	4.74693	3.24e-06
ENSG00000013619	MAMLD1	4.49903	3.26e-06
ENSG00000156103	MMP16	-4.67326	3.36e-06
ENSG00000284337	AC013271.1	-9.01641	3.39e-06
ENSG00000287356	AL590822.3	-9.01641	3.39e-06
ENSG00000186105	LRRC70	-9.01641	3.39e-06
ENSG00000178429	RPS3AP5	-9.01641	3.39e-06
ENSG00000164619	BMPER	-9.01641	3.39e-06
ENSG00000163121	NEURL3	-9.01641	3.39e-06
ENSG00000104967	NOVA2	-8.99655	3.39e-06
ENSG00000228412	LNC-LBCS	-8.99655	3.39e-06
ENSG00000285637	AL161449.2	-8.99655	3.39e-06
ENSG00000226329	AC005682.1	-8.99655	3.39e-06
ENSG00000287134	AC106845.1	-8.99655	3.39e-06
ENSG00000274204	AL138689.1	-8.99655	3.39e-06
ENSG00000171587	DSCAM	-5.82408	3.4e-06
ENSG00000204758	AC008429.1	4.65261	3.46e-06
ENSG00000131746	TNS4	-4.46975	3.5e-06
ENSG00000069702	TGFBR3	4.46719	3.6e-06
ENSG00000120658	ENOX1	5.12451	3.61e-06
ENSG00000280080	TBC1D22A-AS1	-5.25776	3.63e-06
ENSG00000148516	ZEB1	4.52545	3.64e-06
ENSG00000105974	CAV1	-4.43026	3.66e-06
ENSG00000174233	ADCY6	4.46596	3.69e-06
ENSG00000242290	ZBTB20-AS5	9.01091	3.7e-06
ENSG00000105695	MAG	9.01091	3.7e-06
ENSG00000261226	AC092384.3	9.01091	3.7e-06
ENSG00000203618	GP1BB	9.01091	3.7e-06
ENSG00000256274	TAS2R64P	-8.97641	3.7e-06
ENSG00000102962	CCL22	-8.97641	3.7e-06
ENSG00000120949	TNFRSF8	-8.97641	3.7e-06
ENSG00000101842	VSIG1	-8.97641	3.7e-06
ENSG00000242512	LINC01206	-8.97641	3.7e-06
ENSG00000269706	AC008687.6	-8.97641	3.7e-06
ENSG00000134339	SAA2	-8.97641	3.7e-06
ENSG00000186300	ZNF555	5.21087	3.7e-06
ENSG00000270504	AL391422.4	4.73557	3.76e-06
ENSG00000107317	PTGDS	5.34194	3.76e-06
ENSG00000166450	PRTG	5.34194	3.76e-06
ENSG00000136688	IL36G	-4.79378	3.79e-06
ENSG00000148143	ZNF462	-4.4695	3.8e-06
ENSG00000278224	PRICKLE4	6.45518	3.94e-06
ENSG00000115616	SLC9A2	-5.22921	4e-06
ENSG00000136244	IL6	-4.50092	4.02e-06
ENSG00000079841	RIMS1	4.88097	4.02e-06
ENSG00000223486	AC092198.1	8.98497	4.03e-06
ENSG00000120211	INSL4	8.98497	4.03e-06
ENSG00000248245	AC010307.2	8.98497	4.03e-06
ENSG00000197406	DIO3	8.98497	4.03e-06
ENSG00000222033	LINC01124	8.98497	4.03e-06
ENSG00000260253	AC084262.1	8.98497	4.03e-06
ENSG00000163376	KBTBD8	-8.95599	4.03e-06
ENSG00000100341	PNPLA5	-8.95599	4.03e-06
ENSG00000196653	ZNF502	-8.95599	4.03e-06
ENSG00000126016	AMOT	-8.95599	4.03e-06
ENSG00000146938	NLGN4X	-8.95599	4.03e-06
ENSG00000198947	DMD	4.4332	4.06e-06
ENSG00000271781	AC026740.1	4.93749	4.13e-06
ENSG00000214694	ARHGEF33	4.89956	4.17e-06
ENSG00000248124	RRN3P1	-5.43081	4.18e-06
ENSG00000206075	SERPINB5	-4.41428	4.2e-06
ENSG00000105289	TJP3	4.6026	4.21e-06
ENSG00000277496	AL357033.4	4.5529	4.21e-06
ENSG00000140092	FBLN5	4.53707	4.37e-06
ENSG00000280104	AC010608.3	5.29713	4.39e-06
ENSG00000130635	COL5A1	4.38446	4.39e-06
ENSG00000242242	NECTIN3-AS1	5.16116	4.39e-06
ENSG00000106078	COBL	4.4037	4.4e-06
ENSG00000268964	ERVV-2	8.95855	4.41e-06
ENSG00000254979	AP000781.2	8.95855	4.41e-06
ENSG00000110484	SCGB2A2	8.95855	4.41e-06
ENSG00000004468	CD38	-8.93527	4.41e-06
ENSG00000260788	AC009063.2	-8.93527	4.41e-06
ENSG00000187987	ZSCAN23	-8.93527	4.41e-06
ENSG00000225362	CT62	-8.93527	4.41e-06
ENSG00000054392	HHAT	-8.93527	4.41e-06
ENSG00000261837	AC046158.2	-8.93527	4.41e-06
ENSG00000241458	RPL7P19	-8.93527	4.41e-06
ENSG00000172817	CYP7B1	-4.79386	4.48e-06
ENSG00000228824	MIR4500HG	5.83477	4.62e-06
ENSG00000122870	BICC1	4.39272	4.63e-06
ENSG00000225465	RFPL1S	6.39793	4.79e-06
ENSG00000186197	EDARADD	-6.04609	4.79e-06
ENSG00000109101	FOXN1	4.70073	4.8e-06
ENSG00000108515	ENO3	4.39165	4.8e-06
ENSG00000230484	OR51A10P	8.93164	4.82e-06
ENSG00000279166	AC009951.4	8.93164	4.82e-06
ENSG00000227488	GAGE12D	8.93164	4.82e-06
ENSG00000280191	LINC01669	8.93164	4.82e-06
ENSG00000148513	ANKRD30A	8.93164	4.82e-06
ENSG00000144837	PLA1A	8.93164	4.82e-06
ENSG00000140090	SLC24A4	-8.91425	4.82e-06
ENSG00000239282	CASTOR1	-8.91425	4.82e-06
ENSG00000279852	AC083964.2	-8.91425	4.82e-06
ENSG00000183023	SLC8A1	-8.91425	4.82e-06
ENSG00000235961	PNMA6A	-8.91425	4.82e-06
ENSG00000250770	AC005865.1	-8.91425	4.82e-06
ENSG00000267313	AC021504.1	-8.91425	4.82e-06
ENSG00000144452	ABCA12	-5.38023	5.04e-06
ENSG00000141905	NFIC	4.36407	5.07e-06
ENSG00000157064	NMNAT2	-4.76414	5.13e-06
ENSG00000277883	NLRP3P1	-5.01921	5.16e-06
ENSG00000136010	ALDH1L2	4.40244	5.23e-06
ENSG00000114626	ABTB1	4.39939	5.28e-06
ENSG00000181031	RPH3AL	8.90421	5.29e-06
ENSG00000125246	CLYBL	8.90421	5.29e-06
ENSG00000103647	CORO2B	-8.89292	5.29e-06
ENSG00000260577	AC126773.4	-8.89292	5.29e-06
ENSG00000267774	AC010776.2	-8.89292	5.29e-06
ENSG00000281097	LINC01395	-8.89292	5.29e-06
ENSG00000158427	TMSB15B	-8.89292	5.29e-06
ENSG00000104321	TRPA1	-8.89292	5.29e-06
ENSG00000184845	DRD1	-8.89292	5.29e-06
ENSG00000172243	CLEC7A	-8.89292	5.29e-06
ENSG00000091592	NLRP1	-4.57664	5.32e-06
ENSG00000279814	AC010997.6	4.8364	5.32e-06
ENSG00000116574	RHOU	4.45745	5.44e-06
ENSG00000177721	ANXA2R	4.48095	5.47e-06
ENSG00000169071	ROR2	4.36781	5.51e-06
ENSG00000105419	MEIS3	4.48259	5.54e-06
ENSG00000012124	CD22	4.94933	5.57e-06
ENSG00000128596	CCDC136	-4.99213	5.65e-06
ENSG00000139629	GALNT6	-4.78955	5.66e-06
ENSG00000137648	TMPRSS4	-4.55853	5.7e-06
ENSG00000165474	GJB2	-4.408	5.71e-06
ENSG00000177984	LCN15	8.87626	5.8e-06
ENSG00000228810	PABPC1P11	8.87626	5.8e-06
ENSG00000203778	FAM229B	8.87626	5.8e-06
ENSG00000279516	FAM230C	8.87626	5.8e-06
ENSG00000102575	ACP5	-8.87127	5.8e-06
ENSG00000225548	LINC01980	-8.87127	5.8e-06
ENSG00000180616	SSTR2	-8.87127	5.8e-06
ENSG00000260860	AC126773.5	-8.87127	5.8e-06
ENSG00000279733	AP001642.1	-8.87127	5.8e-06
ENSG00000164743	C8orf48	-8.87127	5.8e-06
ENSG00000176593	AC008969.1	-8.87127	5.8e-06
ENSG00000256249	AC026333.3	-8.87127	5.8e-06
ENSG00000259594	AC023034.1	-8.87127	5.8e-06
ENSG00000136274	NACAD	-8.87127	5.8e-06
ENSG00000245648	AC022075.1	-4.98528	5.82e-06
ENSG00000141542	RAB40B	4.45724	5.95e-06
ENSG00000165816	VWA2	-4.64029	5.98e-06
ENSG00000162878	PKDCC	4.80008	6.18e-06
ENSG00000101265	RASSF2	4.39088	6.31e-06
ENSG00000145431	PDGFC	-4.4046	6.34e-06
ENSG00000228649	SNHG26	-4.3687	6.34e-06
ENSG00000050165	DKK3	-4.34469	6.37e-06
ENSG00000243859	RPL5P17	-8.8493	6.37e-06
ENSG00000160325	CACFD1	-8.8493	6.37e-06
ENSG00000137558	PI15	-8.8493	6.37e-06
ENSG00000242808	SOX2-OT	-8.8493	6.37e-06
ENSG00000152128	TMEM163	-8.8493	6.37e-06
ENSG00000235784	HNRNPA1P29	-8.8493	6.37e-06
ENSG00000144935	TRPC1	-8.8493	6.37e-06
ENSG00000204941	PSG5	-8.8493	6.37e-06
ENSG00000257207	AC112229.3	-8.8493	6.37e-06
ENSG00000285831	AC027329.1	-8.8493	6.37e-06
ENSG00000249082	C5orf66-AS1	8.84775	6.37e-06
ENSG00000113721	PDGFRB	8.84775	6.37e-06
ENSG00000237484	LINC01684	8.84775	6.37e-06
ENSG00000262884	AC015921.1	8.84775	6.37e-06
ENSG00000253485	PCDHGA5	-4.96454	6.38e-06
ENSG00000127920	GNG11	4.37671	6.4e-06
ENSG00000214736	TOMM6	-4.32896	6.45e-06
ENSG00000106025	TSPAN12	4.49242	6.45e-06
ENSG00000133424	LARGE1	-4.85225	6.55e-06
ENSG00000196724	ZNF418	-8.82698	7.01e-06
ENSG00000167741	GGT6	-8.82698	7.01e-06
ENSG00000261147	AC091167.2	-8.82698	7.01e-06
ENSG00000197977	ELOVL2	-8.82698	7.01e-06
ENSG00000264668	AC138696.1	-8.82698	7.01e-06
ENSG00000196335	STK31	-8.82698	7.01e-06
ENSG00000171044	XKR6	-8.80431	7.01e-06
ENSG00000225206	MIR137HG	-8.80431	7.01e-06
ENSG00000242474	AC093627.5	-8.80431	7.01e-06
ENSG00000102996	MMP15	4.28996	7.07e-06
ENSG00000113140	SPARC	-4.28914	7.08e-06
ENSG00000139174	PRICKLE1	-4.5261	7.24e-06
ENSG00000184785	SMIM10	4.35451	7.33e-06
ENSG00000171649	ZIK1	-4.72184	7.36e-06
ENSG00000151376	ME3	4.32883	7.43e-06
ENSG00000182118	FAM89A	-4.66502	7.45e-06
ENSG00000147408	CSGALNACT1	4.28611	7.5e-06
ENSG00000256139	AC007637.1	8.81867	7.73e-06
ENSG00000226237	GAS1RR	8.81867	7.73e-06
ENSG00000149968	MMP3	-8.78128	7.73e-06
ENSG00000163064	EN1	-8.78128	7.73e-06
ENSG00000165194	PCDH19	-8.78128	7.73e-06
ENSG00000183196	CHST6	-8.78128	7.73e-06
ENSG00000272913	AC009237.14	-8.78128	7.73e-06
ENSG00000258412	AL355102.1	-8.78128	7.73e-06
ENSG00000229321	AC008269.1	-8.78128	7.73e-06
ENSG00000152779	SLC16A12	-8.78128	7.73e-06
ENSG00000208892	SNORA49	-5.27341	7.77e-06
ENSG00000129757	CDKN1C	4.33263	7.84e-06
ENSG00000249007	AL691482.4	4.44055	7.87e-06
ENSG00000135547	HEY2	4.85761	7.9e-06
ENSG00000197381	ADARB1	4.25309	7.95e-06
ENSG00000173705	SUSD5	-4.60532	7.98e-06
ENSG00000218537	MIF-AS1	-4.31477	8.14e-06
ENSG00000170456	DENND5B	4.2463	8.15e-06
ENSG00000172164	SNTB1	4.38709	8.17e-06
ENSG00000166823	MESP1	4.56523	8.21e-06
ENSG00000172650	AGAP5	4.72457	8.22e-06
ENSG00000139508	SLC46A3	4.53303	8.31e-06
ENSG00000048740	CELF2	4.42396	8.43e-06
ENSG00000145287	PLAC8	4.52322	8.43e-06
ENSG00000162104	ADCY9	4.23706	8.44e-06
ENSG00000273840	AF254983.1	8.78899	8.53e-06
ENSG00000185669	SNAI3	8.78899	8.53e-06
ENSG00000027644	INSRR	8.78899	8.53e-06
ENSG00000259422	AC091100.1	8.78899	8.53e-06
ENSG00000186583	SPATC1	8.78899	8.53e-06
ENSG00000259129	LINC00648	8.78899	8.53e-06
ENSG00000181609	OR52D1	8.78899	8.53e-06
ENSG00000253190	AC084082.1	-8.75787	8.53e-06
ENSG00000285407	AL033530.1	-8.75787	8.53e-06
ENSG00000144045	DQX1	-8.75787	8.53e-06
ENSG00000227640	SOX21-AS1	-8.75787	8.53e-06
ENSG00000170477	KRT4	-8.75787	8.53e-06
ENSG00000257126	FOXG1-AS1	-8.75787	8.53e-06
ENSG00000232586	KIAA1614-AS1	-8.75787	8.53e-06
ENSG00000138061	CYP1B1	-4.22749	8.53e-06
ENSG00000132164	SLC6A11	-4.54917	8.54e-06
ENSG00000182782	HCAR2	-4.4275	8.87e-06
ENSG00000142798	HSPG2	4.20674	8.88e-06
ENSG00000103942	HOMER2	-4.30813	8.91e-06
ENSG00000251131	AC025171.3	4.77065	9.06e-06
ENSG00000162006	MSLNL	4.88655	9.17e-06
ENSG00000169035	KLK7	-4.86358	9.37e-06
ENSG00000006283	CACNA1G	8.75868	9.43e-06
ENSG00000168394	TAP1	8.75868	9.43e-06
ENSG00000288393	AP003086.3	8.75868	9.43e-06
ENSG00000164089	ETNPPL	8.75868	9.43e-06
ENSG00000182327	GLTPD2	8.75868	9.43e-06
ENSG00000231742	LINC01273	8.75868	9.43e-06
ENSG00000255100	AP003119.2	8.75868	9.43e-06
ENSG00000239627	RPL12P20	8.75868	9.43e-06
ENSG00000229586	TNPO1P3	-8.73408	9.43e-06
ENSG00000281386	AP003500.1	-8.73408	9.43e-06
ENSG00000074966	TXK	-8.73408	9.43e-06
ENSG00000279138	AP002847.1	-8.73408	9.43e-06
ENSG00000147573	TRIM55	-8.73408	9.43e-06
ENSG00000249364	AC112206.2	-8.73408	9.43e-06
ENSG00000104827	CGB3	-8.73408	9.43e-06
ENSG00000170961	HAS2	-4.22485	9.46e-06
ENSG00000181191	PJA1	-4.32217	9.53e-06
ENSG00000276351	AC004556.4	6.21114	9.63e-06
ENSG00000185112	FAM43A	4.20726	9.72e-06
ENSG00000087253	LPCAT2	-4.22295	9.81e-06
ENSG00000256146	AC006206.1	-4.74782	9.83e-06
ENSG00000198626	RYR2	4.21512	9.88e-06
ENSG00000126882	FAM78A	4.65031	1e-05
ENSG00000234476	LINC02765	4.71022	1.01e-05
ENSG00000109072	VTN	4.45837	1.02e-05
ENSG00000143036	SLC44A3	-4.58736	1.03e-05
ENSG00000171227	TMEM37	4.37637	1.03e-05
ENSG00000270722	RNVU1-31	-4.30296	1.03e-05
ENSG00000261997	AC007336.1	-4.84099	1.03e-05
ENSG00000171303	KCNK3	8.72773	1.04e-05
ENSG00000233273	AMMECR1LP1	8.72773	1.04e-05
ENSG00000233178	AL161457.2	-8.70989	1.04e-05
ENSG00000240137	ERICH6-AS1	-8.70989	1.04e-05
ENSG00000189108	IL1RAPL2	-8.70989	1.04e-05
ENSG00000131398	KCNC3	-8.70989	1.04e-05
ENSG00000214999	AC129492.1	-8.70989	1.04e-05
ENSG00000164283	ESM1	-8.70989	1.04e-05
ENSG00000205403	CFI	-8.70989	1.04e-05
ENSG00000148926	ADM	4.18559	1.05e-05
ENSG00000197043	ANXA6	4.19694	1.09e-05
ENSG00000260630	SNAI3-AS1	4.77087	1.1e-05
ENSG00000124615	MOCS1	-4.82574	1.11e-05
ENSG00000007264	MATK	4.22056	1.13e-05
ENSG00000111432	FZD10	4.15953	1.13e-05
ENSG00000132640	BTBD3	4.15292	1.14e-05
ENSG00000154263	ABCA10	-4.29519	1.15e-05
ENSG00000167588	GPD1	8.69609	1.16e-05
ENSG00000164398	ACSL6	8.69609	1.16e-05
ENSG00000283380	AL807742.1	8.69609	1.16e-05
ENSG00000251359	WWC2-AS2	8.69609	1.16e-05
ENSG00000228323	MYADM-AS1	8.69609	1.16e-05
ENSG00000198520	ARMH1	8.69609	1.16e-05
ENSG00000169026	SLC49A3	8.69609	1.16e-05
ENSG00000287921	AL713868.1	8.69609	1.16e-05
ENSG00000282221	AC119427.1	-8.68529	1.16e-05
ENSG00000128849	CGNL1	-8.68529	1.16e-05
ENSG00000242428	C3orf67-AS1	-8.68529	1.16e-05
ENSG00000248429	FAM198B-AS1	-8.68529	1.16e-05
ENSG00000061918	GUCY1B1	-8.68529	1.16e-05
ENSG00000139269	INHBE	-8.68529	1.16e-05
ENSG00000123407	HOXC12	-8.68529	1.16e-05
ENSG00000257083	AC073530.1	-8.68529	1.16e-05
ENSG00000244474	UGT1A4	-8.68529	1.16e-05
ENSG00000286843	AL160159.1	-8.68529	1.16e-05
ENSG00000134538	SLCO1B1	-8.68529	1.16e-05
ENSG00000230091	TMEM254-AS1	-8.68529	1.16e-05
ENSG00000231131	LNCAROD	-8.68529	1.16e-05
ENSG00000254556	AF131215.2	-8.68529	1.16e-05
ENSG00000151692	RNF144A	-4.55275	1.17e-05
ENSG00000266903	AC243964.3	4.66558	1.18e-05
ENSG00000077935	SMC1B	4.33686	1.19e-05
ENSG00000140675	SLC5A2	5.03139	1.21e-05
ENSG00000204991	SPIRE2	4.14603	1.21e-05
ENSG00000198959	TGM2	4.14311	1.22e-05
ENSG00000133067	LGR6	-4.79473	1.23e-05
ENSG00000202538	RNU4-2	-4.36087	1.26e-05
ENSG00000135604	STX11	4.42616	1.27e-05
ENSG00000233175	AC008105.1	4.73696	1.28e-05
ENSG00000267943	AC010328.1	8.66375	1.29e-05
ENSG00000186198	SLC51B	8.66375	1.29e-05
ENSG00000288012	AP003307.2	8.66375	1.29e-05
ENSG00000265148	TSPOAP1-AS1	8.66375	1.29e-05
ENSG00000123612	ACVR1C	-8.66026	1.29e-05
ENSG00000197093	GAL3ST4	-8.66026	1.29e-05
ENSG00000185904	LINC00839	-8.66026	1.29e-05
ENSG00000287460	AL442636.1	-8.66026	1.29e-05
ENSG00000177990	DPY19L2	-8.66026	1.29e-05
ENSG00000113430	IRX4	-8.66026	1.29e-05
ENSG00000148704	VAX1	-8.66026	1.29e-05
ENSG00000197085	NPSR1-AS1	-8.66026	1.29e-05
ENSG00000284969	AL049629.2	-8.66026	1.29e-05
ENSG00000179314	WSCD1	-8.66026	1.29e-05
ENSG00000185304	RGPD2	-4.23684	1.29e-05
ENSG00000163689	C3orf67	-4.27044	1.29e-05
ENSG00000167552	TUBA1A	-4.15526	1.34e-05
ENSG00000124920	MYRF	4.13977	1.34e-05
ENSG00000161940	BCL6B	4.78447	1.35e-05
ENSG00000109265	CRACD	4.38665	1.37e-05
ENSG00000205309	NT5M	4.71389	1.39e-05
ENSG00000133083	DCLK1	-4.56916	1.39e-05
ENSG00000136167	LCP1	-4.13364	1.39e-05
ENSG00000114631	PODXL2	4.10785	1.4e-05
ENSG00000181072	CHRM2	-8.63479	1.43e-05
ENSG00000249084	AC027627.1	-8.63479	1.43e-05
ENSG00000278893	AC010533.1	-8.63479	1.43e-05
ENSG00000165810	BTNL9	-8.63479	1.43e-05
ENSG00000287235	AL732437.2	-8.63479	1.43e-05
ENSG00000275340	FGD5P1	-8.63479	1.43e-05
ENSG00000250041	AC069360.1	-8.63479	1.43e-05
ENSG00000279581	AC073862.2	8.63067	1.43e-05
ENSG00000261522	AL845331.3	8.63067	1.43e-05
ENSG00000228933	AC107419.1	8.63067	1.43e-05
ENSG00000164318	EGFLAM	8.63067	1.43e-05
ENSG00000286965	AC108066.2	8.63067	1.43e-05
ENSG00000180264	ADGRD2	8.63067	1.43e-05
ENSG00000104043	ATP8B4	8.63067	1.43e-05
ENSG00000230140	NPAS2-AS1	8.63067	1.43e-05
ENSG00000124215	CDH26	-8.60886	1.43e-05
ENSG00000166405	RIC3	-8.60886	1.43e-05
ENSG00000198515	CNGA1	-8.60886	1.43e-05
ENSG00000229696	KARS1P1	-8.60886	1.43e-05
ENSG00000235486	AC114755.5	-8.60886	1.43e-05
ENSG00000224713	AC025165.1	-8.60886	1.43e-05
ENSG00000185924	RTN4RL1	-8.60886	1.43e-05
ENSG00000237975	FLG-AS1	-8.60886	1.43e-05
ENSG00000186862	PDZD7	5.54734	1.45e-05
ENSG00000198915	RASGEF1A	4.20701	1.47e-05
ENSG00000225828	FAM229A	4.28381	1.47e-05
ENSG00000271601	LIX1L	4.10781	1.54e-05
ENSG00000127561	SYNGR3	4.14856	1.54e-05
ENSG00000277969	AC006449.7	4.97562	1.55e-05
ENSG00000128266	GNAZ	-4.36237	1.56e-05
ENSG00000235142	LINC02532	4.36409	1.57e-05
ENSG00000248360	LINC00504	-4.524	1.59e-05
ENSG00000162849	KIF26B	-8.58245	1.6e-05
ENSG00000249631	AC005699.1	-8.58245	1.6e-05
ENSG00000178836	AC114812.1	-8.58245	1.6e-05
ENSG00000253463	HMGB1P19	-8.58245	1.6e-05
ENSG00000213003	BTF3P12	-8.58245	1.6e-05
ENSG00000088881	EBF4	-8.58245	1.6e-05
ENSG00000268287	AC008687.3	-8.58245	1.6e-05
ENSG00000237356	AL365295.1	-8.58245	1.6e-05
ENSG00000267745	AC060766.7	-8.58245	1.6e-05
ENSG00000263366	ABHD17AP5	-8.58245	1.6e-05
ENSG00000185634	SHC4	4.55184	1.61e-05
ENSG00000207145	SNORA18	-5.7247	1.65e-05
ENSG00000188906	LRRK2	4.20175	1.66e-05
ENSG00000125430	HS3ST3B1	-4.71418	1.68e-05
ENSG00000140795	MYLK3	4.12722	1.69e-05
ENSG00000128591	FLNC	-4.22648	1.7e-05
ENSG00000113448	PDE4D	4.05132	1.7e-05
ENSG00000243609	RPS2P44	-5.06502	1.7e-05
ENSG00000254449	SF3A3P2	4.73058	1.7e-05
ENSG00000165300	SLITRK5	4.11785	1.74e-05
ENSG00000271795	AC011337.1	-4.49724	1.74e-05
ENSG00000250786	SNHG18	-4.85244	1.76e-05
ENSG00000189369	GSPT2	-4.85244	1.76e-05
ENSG00000174137	FAM53A	8.59681	1.79e-05
ENSG00000286769	AC064869.1	8.59681	1.79e-05
ENSG00000204576	PRR3	8.59681	1.79e-05
ENSG00000287376	AL359538.3	8.59681	1.79e-05
ENSG00000279493	FP565260.4	8.59681	1.79e-05
ENSG00000144218	AFF3	8.59681	1.79e-05
ENSG00000228549	BX284668.2	-8.55556	1.79e-05
ENSG00000279537	AC020658.7	-8.55556	1.79e-05
ENSG00000228709	LINC02575	-8.55556	1.79e-05
ENSG00000286358	AC096647.1	-8.55556	1.79e-05
ENSG00000073737	DHRS9	-8.55556	1.79e-05
ENSG00000287407	AL596442.3	-8.55556	1.79e-05
ENSG00000234352	AC009264.1	-8.55556	1.79e-05
ENSG00000256268	LINC02454	-8.55556	1.79e-05
ENSG00000131080	EDA2R	-8.55556	1.79e-05
ENSG00000186684	CYP27C1	-4.1958	1.81e-05
ENSG00000189431	RASSF10	-4.1412	1.82e-05
ENSG00000165626	BEND7	-4.58309	1.85e-05
ENSG00000139973	SYT16	-4.23583	1.87e-05
ENSG00000129675	ARHGEF6	4.9176	1.88e-05
ENSG00000168743	NPNT	4.03214	1.88e-05
ENSG00000143217	NECTIN4	-4.31206	1.88e-05
ENSG00000122641	INHBA	-4.04696	1.91e-05
ENSG00000273143	AL355512.1	4.21535	1.92e-05
ENSG00000244274	DBNDD2	-4.14151	1.93e-05
ENSG00000028137	TNFRSF1B	4.13239	1.95e-05
ENSG00000259256	LINC01895	4.29566	1.98e-05
ENSG00000065621	GSTO2	-4.04953	1.99e-05
ENSG00000287325	AC138647.2	8.56213	2e-05
ENSG00000286133	AC093817.2	8.56213	2e-05
ENSG00000185739	SRL	8.56213	2e-05
ENSG00000139194	RBP5	8.56213	2e-05
ENSG00000263499	AC007431.1	8.56213	2e-05
ENSG00000234754	LINC02817	8.56213	2e-05
ENSG00000100678	SLC8A3	8.56213	2e-05
ENSG00000286649	AC006566.2	8.56213	2e-05
ENSG00000223829	AC004870.2	8.56213	2e-05
ENSG00000105146	AURKC	-8.52815	2e-05
ENSG00000110446	SLC15A3	-8.52815	2e-05
ENSG00000116157	GPX7	-8.52815	2e-05
ENSG00000128714	HOXD13	-8.52815	2e-05
ENSG00000241003	AC108860.1	-8.52815	2e-05
ENSG00000138395	CDK15	-8.52815	2e-05
ENSG00000287906	AC127526.5	-8.52815	2e-05
ENSG00000112218	GPR63	-8.52815	2e-05
ENSG00000183486	MX2	-8.52815	2e-05
ENSG00000137872	SEMA6D	4.06512	2e-05
ENSG00000152580	IGSF10	-4.66359	2.02e-05
ENSG00000099365	STX1B	4.20342	2.03e-05
ENSG00000215068	AC025171.2	4.02852	2.06e-05
ENSG00000230750	SDAD1P2	-4.65499	2.1e-05
ENSG00000064225	ST3GAL6	-5.34289	2.1e-05
ENSG00000279319	AC105074.1	-5.64684	2.11e-05
ENSG00000282865	AL157815.1	5.43047	2.14e-05
ENSG00000031081	ARHGAP31	4.05453	2.24e-05
ENSG00000103313	MEFV	8.5266	2.24e-05
ENSG00000278289	CT45A6	8.5266	2.24e-05
ENSG00000173175	ADCY5	8.5266	2.24e-05
ENSG00000271009	AC116667.1	8.5266	2.24e-05
ENSG00000176239	OR51B6	8.5266	2.24e-05
ENSG00000228206	AC016717.1	8.5266	2.24e-05
ENSG00000268940	CT45A1	8.5266	2.24e-05
ENSG00000259505	AC009268.1	-8.50021	2.24e-05
ENSG00000225356	AC093840.1	-8.50021	2.24e-05
ENSG00000266865	AC138207.8	-8.50021	2.24e-05
ENSG00000285128	AC092306.1	-8.50021	2.24e-05
ENSG00000227802	DNAJB3	-8.50021	2.24e-05
ENSG00000229107	ABHD17AP4	-8.50021	2.24e-05
ENSG00000228742	LINC02577	-8.50021	2.24e-05
ENSG00000026751	SLAMF7	-8.50021	2.24e-05
ENSG00000276788	SNORD26	-5.6267	2.3e-05
ENSG00000276386	CNTNAP3P2	-4.37268	2.3e-05
ENSG00000160781	PAQR6	4.16771	2.31e-05
ENSG00000166780	BMERB1	4.05784	2.32e-05
ENSG00000163364	LINC01116	-5.3167	2.35e-05
ENSG00000279277	AC012020.1	-4.76565	2.36e-05
ENSG00000240038	AMY2B	4.58	2.36e-05
ENSG00000260077	AC104794.3	4.64579	2.37e-05
ENSG00000167046	AL357033.1	4.64579	2.37e-05
ENSG00000185950	IRS2	3.9612	2.4e-05
ENSG00000254166	CASC19	3.95903	2.43e-05
ENSG00000140465	CYP1A1	-4.03782	2.45e-05
ENSG00000270011	ZNF559-ZNF177	5.41004	2.45e-05
ENSG00000267924	AC139769.2	4.85715	2.45e-05
ENSG00000259605	AC074212.1	4.26165	2.45e-05
ENSG00000229980	TOB1-AS1	4.56719	2.47e-05
ENSG00000273768	RNVU1-29	-3.97942	2.49e-05
ENSG00000160460	AC020929.1	4.23239	2.5e-05
ENSG00000164687	FABP5	-3.97793	2.51e-05
ENSG00000279296	PRAL	-4.3527	2.51e-05
ENSG00000161328	LRRC56	8.49018	2.52e-05
ENSG00000254290	AC124067.4	8.49018	2.52e-05
ENSG00000256982	AC135782.1	8.49018	2.52e-05
ENSG00000150773	PIH1D2	8.49018	2.52e-05
ENSG00000160683	CXCR5	8.49018	2.52e-05
ENSG00000259807	AC009093.1	8.49018	2.52e-05
ENSG00000255281	AC090124.2	8.49018	2.52e-05
ENSG00000226696	LENG8-AS1	8.49018	2.52e-05
ENSG00000203279	AL590705.1	8.49018	2.52e-05
ENSG00000239344	AC090686.1	-8.47172	2.52e-05
ENSG00000140519	RHCG	-8.47172	2.52e-05
ENSG00000264448	MIR378D2HG	-8.47172	2.52e-05
ENSG00000188732	FAM221A	-8.47172	2.52e-05
ENSG00000269989	AC036176.3	-8.47172	2.52e-05
ENSG00000164867	NOS3	-8.47172	2.52e-05
ENSG00000253991	AP001207.2	-8.47172	2.52e-05
ENSG00000267879	AC011483.1	-8.47172	2.52e-05
ENSG00000229000	SEPTIN7P8	-8.47172	2.52e-05
ENSG00000154188	ANGPT1	-8.47172	2.52e-05
ENSG00000250299	MRPS31P4	-8.47172	2.52e-05
ENSG00000271857	AL096865.1	-8.47172	2.52e-05
ENSG00000133519	ZDHHC8P1	-8.47172	2.52e-05
ENSG00000112599	GUCA1B	-8.47172	2.52e-05
ENSG00000105472	CLEC11A	-8.47172	2.52e-05
ENSG00000163216	SPRR2D	-8.47172	2.52e-05
ENSG00000179344	HLA-DQB1	-8.47172	2.52e-05
ENSG00000167759	KLK13	-8.47172	2.52e-05
ENSG00000286481	AC011246.1	-8.47172	2.52e-05
ENSG00000261618	LINC02605	-4.60225	2.54e-05
ENSG00000033122	LRRC7	-4.19576	2.55e-05
ENSG00000169860	P2RY1	-4.74563	2.58e-05
ENSG00000103044	HAS3	-3.97766	2.59e-05
ENSG00000063127	SLC6A16	4.83642	2.63e-05
ENSG00000236345	SCAT8	4.83642	2.63e-05
ENSG00000286215	AL356534.1	4.83642	2.63e-05
ENSG00000119125	GDA	3.93816	2.63e-05
ENSG00000130052	STARD8	4.49625	2.64e-05
ENSG00000248092	NNT-AS1	3.94822	2.65e-05
ENSG00000237945	LINC00649	-4.21956	2.66e-05
ENSG00000171903	CYP4F11	-4.73552	2.69e-05
ENSG00000157399	ARSL	4.12448	2.69e-05
ENSG00000143797	MBOAT2	-3.94057	2.7e-05
ENSG00000283445	AL136985.3	4.06732	2.78e-05
ENSG00000284966	AL138689.2	-4.13346	2.79e-05
ENSG00000101311	FERMT1	-3.92167	2.79e-05
ENSG00000123999	INHA	4.68636	2.79e-05
ENSG00000198569	SLC34A3	4.52805	2.81e-05
ENSG00000217576	AL158066.1	5.36828	2.81e-05
ENSG00000177614	PGBD5	-4.20585	2.82e-05
ENSG00000167103	PIP5KL1	8.45281	2.84e-05
ENSG00000237862	Z94160.1	8.45281	2.84e-05
ENSG00000224516	AC068134.1	8.45281	2.84e-05
ENSG00000285636	AL450163.1	8.45281	2.84e-05
ENSG00000277991	FP236241.2	8.45281	2.84e-05
ENSG00000226765	RPSAP33	8.45281	2.84e-05
ENSG00000138483	CCDC54	8.45281	2.84e-05
ENSG00000254701	AC138866.2	8.45281	2.84e-05
ENSG00000232633	AC079465.1	-8.44266	2.84e-05
ENSG00000174808	BTC	-8.44266	2.84e-05
ENSG00000108001	EBF3	-8.44266	2.84e-05
ENSG00000226963	AC078883.2	-8.44266	2.84e-05
ENSG00000147576	ADHFE1	-8.44266	2.84e-05
ENSG00000174963	ZIC4	-8.44266	2.84e-05
ENSG00000233360	Z83844.2	-8.44266	2.84e-05
ENSG00000286232	AL365229.1	-8.44266	2.84e-05
ENSG00000226555	AGKP1	-8.44266	2.84e-05
ENSG00000198468	FLVCR1-DT	4.47281	2.86e-05
ENSG00000196876	SCN8A	-4.93087	2.89e-05
ENSG00000066735	KIF26A	3.91362	2.9e-05
ENSG00000154274	C4orf19	4.10483	2.93e-05
ENSG00000171056	SOX7	-4.06159	2.99e-05
ENSG00000165821	SALL2	-4.25868	3e-05
ENSG00000141497	ZMYND15	4.79406	3.02e-05
ENSG00000256514	AP003419.1	-4.91911	3.04e-05
ENSG00000287001	AC010624.5	-4.34352	3.16e-05
ENSG00000248994	AC124852.1	4.08324	3.16e-05
ENSG00000116675	DNAJC6	3.98903	3.17e-05
ENSG00000223813	AC007255.1	8.41445	3.21e-05
ENSG00000257184	AC004080.3	8.41445	3.21e-05
ENSG00000250978	AC079467.1	8.41445	3.21e-05
ENSG00000224029	AL450344.1	8.41445	3.21e-05
ENSG00000267261	AC099811.2	8.41445	3.21e-05
ENSG00000252697	RN7SKP209	8.41445	3.21e-05
ENSG00000175084	DES	8.41445	3.21e-05
ENSG00000083067	TRPM3	8.41445	3.21e-05
ENSG00000235897	TM4SF19-AS1	-8.413	3.21e-05
ENSG00000265182	SRP72P1	-8.413	3.21e-05
ENSG00000175728	C11orf44	-8.413	3.21e-05
ENSG00000179331	RAB39A	-8.413	3.21e-05
ENSG00000286681	AF235103.3	-8.413	3.21e-05
ENSG00000164744	SUN3	-8.413	3.21e-05
ENSG00000255462	AC104031.1	-8.413	3.21e-05
ENSG00000227268	KLLN	-8.413	3.21e-05
ENSG00000225269	LINC00705	-8.413	3.21e-05
ENSG00000165799	RNASE7	-8.413	3.21e-05
ENSG00000263823	AC009831.1	-8.413	3.21e-05
ENSG00000235472	EIF4A1P7	-8.413	3.21e-05
ENSG00000204366	ZBTB12	-8.38271	3.21e-05
ENSG00000240224	UGT1A5	-8.38271	3.21e-05
ENSG00000237870	AC073130.1	-8.38271	3.21e-05
ENSG00000237989	LINC01679	-8.38271	3.21e-05
ENSG00000189366	ALG1L	-8.38271	3.21e-05
ENSG00000158806	NPM2	-8.38271	3.21e-05
ENSG00000185332	AC027601.1	-8.38271	3.21e-05
ENSG00000261437	AC108860.2	-8.38271	3.21e-05
ENSG00000237978	KCNMB2-AS1	-4.5475	3.22e-05
ENSG00000180448	AC004151.1	3.89786	3.32e-05
ENSG00000223573	TINCR	4.02535	3.34e-05
ENSG00000064300	NGFR	-4.53817	3.35e-05
ENSG00000246090	AP002026.1	-4.52878	3.35e-05
ENSG00000116761	CTH	3.90248	3.35e-05
ENSG00000164136	IL15	4.15059	3.36e-05
ENSG00000261040	WFDC21P	4.19389	3.36e-05
ENSG00000262185	LINC02861	4.48783	3.36e-05
ENSG00000155085	AK9	4.75041	3.48e-05
ENSG00000139926	FRMD6	-3.86365	3.53e-05
ENSG00000189280	GJB5	-3.9113	3.55e-05
ENSG00000245970	AP003352.1	-3.9742	3.57e-05
ENSG00000172889	EGFL7	3.87658	3.59e-05
ENSG00000159714	ZDHHC1	-4.08572	3.6e-05
ENSG00000277449	CEBPB-AS1	8.37503	3.63e-05
ENSG00000125810	CD93	8.37503	3.63e-05
ENSG00000258461	AC012651.1	8.37503	3.63e-05
ENSG00000267934	AC010300.1	8.37503	3.63e-05
ENSG00000109705	NKX3-2	8.37503	3.63e-05
ENSG00000187955	COL14A1	8.37503	3.63e-05
ENSG00000231274	SBK3	8.37503	3.63e-05
ENSG00000139151	PLCZ1	-8.35178	3.63e-05
ENSG00000204869	IGFL4	-8.35178	3.63e-05
ENSG00000221740	SNORD93	-8.35178	3.63e-05
ENSG00000128482	RNF112	-8.35178	3.63e-05
ENSG00000162241	SLC25A45	3.94466	3.65e-05
ENSG00000134955	SLC37A2	-3.9449	3.67e-05
ENSG00000179909	ZNF154	-4.13526	3.68e-05
ENSG00000164093	PITX2	-4.10437	3.71e-05
ENSG00000173391	OLR1	-3.8539	3.71e-05
ENSG00000153002	CPB1	4.52436	3.73e-05
ENSG00000116678	LEPR	3.9912	3.74e-05
ENSG00000260490	MYL12BP1	-5.19254	3.76e-05
ENSG00000142178	SIK1	3.835	3.8e-05
ENSG00000196782	MAML3	3.92444	3.8e-05
ENSG00000237438	CECR7	4.03985	3.81e-05
ENSG00000223572	CKMT1A	-3.97381	3.83e-05
ENSG00000083720	OXCT1	3.83021	3.93e-05
ENSG00000124942	AHNAK	-3.82356	3.95e-05
ENSG00000197181	PIWIL2	-3.99845	3.96e-05
ENSG00000106688	SLC1A1	3.97785	3.96e-05
ENSG00000196427	NBPF4	4.59572	4e-05
ENSG00000286237	ARMCX5-GPRASP2	4.59572	4e-05
ENSG00000272977	AL008721.2	-3.90512	4.03e-05
[truncated: 6,964 more rows]
